# Supplementary material for: Complementation and joint contribution of appropriate intramolecular coupling and local ion symmetry to improve magnetic relaxation in a series of dinuclear Dy2 single-molecule magnets
Source: Royal Society of Chemistry journal article supplement (doi:10.1039/c6qi00508j), 2017-01-01
Supplement: c6qi00508j1.pdf [file c6qi00508j1.pdf]

## Supporting Information

### Complementation and Joint Contribution of Appropriate Intramolecular Coupling and Local Ion Symmetry to Improve Magnetic Relaxation in Series of Dinuclear Dy<sub>2</sub> Single-Molecule Magnets

*Hao-Ran Tu,<sup>†</sup> Wen-Bin Sun,<sup>\*†</sup> Hong-Feng Li,<sup>†</sup> Peng Chen,<sup>†</sup> Yong-Mei Tian,<sup>\*†</sup> Wan-  
Ying Zhang,<sup>†</sup> Yi-Quan Zhang,<sup>\*‡</sup> and Peng-Fei Yan<sup>†</sup>*

<sup>†</sup>Department Key Laboratory of Functional Inorganic Material Chemistry Ministry of  
Education, Heilongjiang University, Harbin 150080, China.

<sup>‡</sup>Jiangsu Key Laboratory for NSLSCS, School of Physical Science and Technology,  
Nanjing Normal University, Nanjing 210023, China.

E-mail: wenbinsun@126.com; zhangyiquan@njnu.edu.cn

**Table S1.** Crystallographic parameters of all complexes.

|                                             | <i>1</i>                                                                        | <i>2</i>                                                                        | <i>3</i>                                                                                       | <i>3Y</i>                                                                                     |
|---------------------------------------------|---------------------------------------------------------------------------------|---------------------------------------------------------------------------------|------------------------------------------------------------------------------------------------|-----------------------------------------------------------------------------------------------|
| formula                                     | C <sub>72</sub> H <sub>50</sub> Dy <sub>2</sub> F <sub>12</sub> O <sub>14</sub> | C <sub>56</sub> H <sub>42</sub> Dy <sub>2</sub> F <sub>12</sub> O <sub>14</sub> | C <sub>48</sub> H <sub>38</sub> Dy <sub>2</sub> F <sub>12</sub> O <sub>14</sub> S <sub>4</sub> | C <sub>48</sub> H <sub>38</sub> Y <sub>2</sub> F <sub>12</sub> O <sub>14</sub> S <sub>4</sub> |
| FW (g.mol <sup>-1</sup> )                   | 1692.12                                                                         | 1491.90                                                                         | 1520.02                                                                                        | 1372.84                                                                                       |
| Crystal system                              | monoclinic                                                                      | triclinic                                                                       | triclinic                                                                                      | triclinic                                                                                     |
| Space group                                 | C1                                                                              | P-1                                                                             | P-1                                                                                            | P-1                                                                                           |
| Temperature (K)                             | 293(2)                                                                          | 293(2) K                                                                        | 293(2) K                                                                                       | 293(2)                                                                                        |
| a (Å)                                       | 26.2297(6)                                                                      | 9.7688(6)                                                                       | 10.9116(4)                                                                                     | 10.9144(7)                                                                                    |
| b (Å)                                       | 14.2596(3)                                                                      | 12.7894(8)                                                                      | 11.0698(5)                                                                                     | 11.0520(9)                                                                                    |
| c (Å)                                       | 18.5801(5)                                                                      | 13.0685(8)                                                                      | 13.0230(5)                                                                                     | 13.0251(12)                                                                                   |
| α (°)                                       | 90                                                                              | 113.112(6)                                                                      | 71.207(4)                                                                                      | 71.071(8)                                                                                     |
| β (°)                                       | 105.255(3)                                                                      | 105.241(5)                                                                      | 76.793(3)                                                                                      | 76.611(7)                                                                                     |
| γ (°)                                       | 90                                                                              | 99.434(5)                                                                       | 67.239(4)                                                                                      | 67.152(7)                                                                                     |
| V (Å <sup>3</sup> )                         | 6704.6(3)                                                                       | 1381.69(14)                                                                     | 1363.46(9)                                                                                     | 1359.50(19)                                                                                   |
| ρ <sub>calc</sub> (Mg.m <sup>-3</sup> )     | 1.676                                                                           | 1.793                                                                           | 1.851                                                                                          | 1.677                                                                                         |
| μ (mm <sup>-1</sup> )                       | 2.311                                                                           | 2.790                                                                           | 2.976                                                                                          | 2.382                                                                                         |
| F (000)                                     | 3336                                                                            | 730                                                                             | 742                                                                                            | 688                                                                                           |
| Collected reflections                       | 17704                                                                           | 11173                                                                           | 10673                                                                                          | 10797                                                                                         |
| Independent reflections                     | 8606                                                                            | 6347                                                                            | 6167                                                                                           | 6189                                                                                          |
| R <sub>int</sub>                            | 0.0248                                                                          | 0.0676                                                                          | 0.0307                                                                                         | 0.0320                                                                                        |
| R <sub>1</sub> [ <i>I</i> > 2σ( <i>I</i> )] | 0.0869                                                                          | 0.0699                                                                          | 0.0504                                                                                         | 0.0946                                                                                        |
| wR <sup>2</sup> (all data)                  | 0.1672                                                                          | 0.1627                                                                          | 0.1182                                                                                         | 0.1913                                                                                        |
| GOF                                         | 1.059                                                                           | 1.088                                                                           | 1.095                                                                                          | 1.035                                                                                         |

| <i>1a</i>                                                                       | <i>4</i>                                                                        | <i>4a</i>                                                                       | <i>5</i>                                                                        | <i>6</i>                                                                        |
|---------------------------------------------------------------------------------|---------------------------------------------------------------------------------|---------------------------------------------------------------------------------|---------------------------------------------------------------------------------|---------------------------------------------------------------------------------|
| C <sub>74</sub> H <sub>62</sub> Dy <sub>2</sub> F <sub>12</sub> O <sub>18</sub> | C <sub>72</sub> H <sub>50</sub> F <sub>12</sub> O <sub>14</sub> Tb <sub>2</sub> | C <sub>74</sub> H <sub>58</sub> F <sub>12</sub> O <sub>18</sub> Tb <sub>2</sub> | C <sub>72</sub> H <sub>50</sub> Er <sub>2</sub> F <sub>12</sub> O <sub>14</sub> | C <sub>74</sub> H <sub>58</sub> F <sub>12</sub> Gd <sub>2</sub> O <sub>18</sub> |
| 1792.24                                                                         | 1684.96                                                                         | 1781.04                                                                         | 1701.64                                                                         | 1777.70                                                                         |
| Triclinic                                                                       | Monoclinic                                                                      | Triclinic                                                                       | Monoclinic                                                                      | Triclinic                                                                       |
| P 1                                                                             | C2/c                                                                            | P-1                                                                             | C2/c                                                                            | P-1                                                                             |
| 293(2)                                                                          | 293(2)                                                                          | 293(2)                                                                          | 293(2)                                                                          | 293(2)                                                                          |
| 10.4693(5)                                                                      | 26.2874(7)                                                                      | 10.4870(5)                                                                      | 26.1533(5)                                                                      | 10.5094(9)                                                                      |
| 14.2053(8)                                                                      | 14.2711(4)                                                                      | 14.2174(7)                                                                      | 14.2224(3)                                                                      | 14.2002(10)                                                                     |
| 14.5234(7)                                                                      | 18.5381(6)                                                                      | 14.5235(7)                                                                      | 18.6514(5)                                                                      | 14.5239(11)                                                                     |
| 105.513(5)                                                                      | 90.00                                                                           | 65.286(4)                                                                       | 90.00                                                                           | 65.464(7)                                                                       |
| 101.950(4)                                                                      | 105.300(3)                                                                      | 78.174(4)                                                                       | 105.158(2)                                                                      | 78.393(7)                                                                       |
| 111.582(5)                                                                      | 90.00                                                                           | 68.383(4)                                                                       | 90.00                                                                           | 68.374(7)                                                                       |
| 1819.40(16)                                                                     | 6708.1(3)                                                                       | 1825.41(15)                                                                     | 6696.3(3)                                                                       | 1830.0(2)                                                                       |
| 1.636                                                                           | 1.668                                                                           | 1.620                                                                           | 1.688                                                                           | 1.613                                                                           |
| 890                                                                             | 3328.0                                                                          | 884.0                                                                           | 3352.0                                                                          | 882.0                                                                           |
| 15001                                                                           | 26117                                                                           | 13362                                                                           | 17264                                                                           | 15821                                                                           |
| 8220                                                                            | 7929                                                                            | 7443                                                                            | 8364                                                                            | 9161                                                                            |
| 0.0579                                                                          | 0.0717                                                                          | 0.0447                                                                          | 0.0708                                                                          | 0.0525                                                                          |
| 0.1325                                                                          | 0.1207                                                                          | 0.1130                                                                          | 0.1054                                                                          | 0.1237                                                                          |
| 1.079                                                                           | 1.052                                                                           | 1.115                                                                           | 0.973                                                                           | 1.051                                                                           |

---

**7**

---

|                           |                                                                                                |
|---------------------------|------------------------------------------------------------------------------------------------|
| formula                   | C <sub>48</sub> H <sub>38</sub> F <sub>12</sub> Gd <sub>2</sub> O <sub>14</sub> S <sub>4</sub> |
| FW (g.mol <sup>-1</sup> ) | 1509.58                                                                                        |
| Crystal system            | triclinic                                                                                      |
| Space group               | P-1                                                                                            |
| Temperature (K)           | 293                                                                                            |
| a (Å)                     | 10.9212(6)                                                                                     |

|                                            |             |
|--------------------------------------------|-------------|
| b (Å)                                      | 11.0906(6)  |
| c (Å)                                      | 13.0365(5)  |
| $\alpha$ (°)                               | 71.247(4)   |
| $\beta$ (°)                                | 76.901(4)   |
| $\gamma$ (°)                               | 67.048(5)   |
| V (Å <sup>3</sup> )                        | 1367.49(13) |
| $\rho_{\text{calc}}$ (Mg.m <sup>-3</sup> ) | 1.8329      |
| $\mu$ (mm <sup>-1</sup> )                  | 2.653       |
| F (000)                                    | 739.2       |
| Collected reflections                      | 11433       |
| Independent reflections                    | 6742        |
| R <sub>int</sub>                           | 0.0375      |
| R <sub>1</sub> [ $I > 2\sigma(I)$ ]        | 0.0491      |
| wR <sup>2</sup> (all data)                 | 0.1391      |
| GOF                                        | 1.067       |

---

Table S2. Selected bond lengths (Å) and Angles (°) for **1**

---

|         |          |        |          |
|---------|----------|--------|----------|
| Dy1-O3  | 2.283(3) | Dy1-O5 | 2.300(4) |
| Dy1-O3' | 2.301(3) | Dy1-O6 | 2.301(4) |
| Dy1-O4  | 2.317(4) | Dy1-O7 | 2.329(4) |
| Dy1-O2  | 2.602(4) | Dy1-O1 | 2.624(4) |

---

|              |            |            |            |
|--------------|------------|------------|------------|
| O3-Dy1(1)-O5 | 142.73(14) | O3-Dy1-O3' | 66.59(14)  |
| O5-Dy1-O3'   | 138.26(14) | O3-Dy1-O6  | 88.70(15)  |
| O5-Dy1-O6    | 87.13(16)  | O3'-Dy1-O6 | 130.42(15) |
| O3-Dy1-O4    | 83.58(14)  | O5-Dy1-O4  | 74.46(14)  |
| O3'-Dy1-O4   | 84.78(13)  | O6-Dy1-O4  | 136.55(15) |
| O3-Dy1-O7    | 117.20(15) | O5-Dy1-O7  | 96.33(15)  |
| O3'-Dy1-O7   | 82.59(14)  | O6-Dy1-O7  | 71.28(15)  |
| O4-Dy1-O7    | 148.24(15) | O3-Dy1-O2  | 129.66(12) |
| O5-Dy1-O2    | 76.37(14)  | O3'-Dy1-O2 | 64.60(12)  |
| O6-Dy1-O2    | 133.30(15) | O4-Dy1-O2  | 80.58(14)  |
| O7-Dy1-O2    | 67.67(14)  | O3-Dy1-O1  | 65.20(12)  |
| O5-Dy1-O1    | 79.38(14)  | O3'-Dy1-O1 | 128.12(12) |
| O6-Dy1-O1    | 65.97(15)  | O4-Dy1-O1  | 72.04(14)  |

Table S3. Selected bond lengths (Å) and Angles (°) for **1a**

|        |          |        |          |
|--------|----------|--------|----------|
| Dy1-O3 | 2.678(4) | Dy1-O7 | 2.350(4) |
| Dy1-O4 | 2.325(4) | Dy1-O6 | 2.415(5) |

---

|             |            |            |            |
|-------------|------------|------------|------------|
| Dy1-O5      | 2.357(4)   | Dy1-O2'    | 2.384(3)   |
| Dy1-O2      | 2.303(3)   | Dy1-O1'    | 2.563(4)   |
| Dy1-O8      | 2.435(4)   |            |            |
| O1'-Dy1-O3  | 144.57(14) | O2-Dy1-O1' | 129.31(12) |
| O2'-Dy1-O1' | 64.22(12)  | O2-Dy1-O2' | 65.72(13)  |
| O2'-Dy1-O3  | 121.68(12) | O2-Dy1-O3  | 63.70(12)  |
| O2-Dy1-O4   | 82.45(13)  | O2-Dy1-O5  | 146.71(13) |
| O2'-Dy1-O6  | 73.44(13)  | O2-Dy1-O6  | 82.34(12)  |
| O2-Dy1-O7   | 132.86(13) | O2'-Dy1-O8 | 68.61(14)  |
| O2-Dy1-O8   | 82.42(13)  | O4-Dy1-O1' | 140.88(14) |
| O4-Dy1-O2'  | 133.28(15) | O4-Dy1-O3  | 64.39(15)  |
| O4-Dy1-O5   | 71.44(15)  | O4-Dy1-O6  | 137.16(15) |
| O4-Dy1-O7   | 92.24(16)  | O4-Dy1-O8  | 74.27(17)  |
| O5-Dy1-O1'  | 75.28(17)  | O5-Dy1-O2' | 119.25(14) |
| O5-Dy1-O3   | 118.87(14) | O5-Dy1-O6  | 130.92(13) |
| O5-Dy1-O8   | 78.61(15)  | O5-Dy1-O8  | 71.06(15)  |

---

|            |            |            |            |
|------------|------------|------------|------------|
| O6-Dy1-O1' | 76.59(14)  | O6-Dy1-O3  | 72.95(14)  |
| O6-Dy1-O8  | 142.05(15) | O7-Dy1-O1' | 81.25(14)  |
| O7-Dy1-O1' | 81.25(14)  | O7-Dy1-O2' | 134.47(14) |
| O7-Dy1-O3  | 71.79(14)  | O7-Dy1-O5  | 69.95(15)  |
| O7-Dy1-O6  | 70.22(14)  | O7-Dy1-O8  | 140.99(14) |
| O7-Dy1-O6  | 128.59(15) |            |            |

Table S4. Selected bond lengths (Å) and Angles (°) for **2**

|           |            |           |            |
|-----------|------------|-----------|------------|
| Dy1-O3    | 2.267(4)   | Dy1-O7    | 2.302(4)   |
| Dy1-O4    | 2.311(5)   | Dy1-O6    | 2.315(5)   |
| Dy1-O5    | 2.321(5)   | Dy1-O3'   | 2.324(4)   |
| Dy1-O2    | 2.597(4)   | Dy1-O1    | 2.627(4)   |
| O3-Dy1-O7 | 142.30(15) | O3-Dy1-O4 | 93.19(17)  |
| O7-Dy1-O4 | 79.65(18)  | O3-Dy1-O6 | 90.09(16)  |
| O7-Dy1-O6 | 73.52(16)  | O4-Dy1-O6 | 139.56(17) |
| O3-Dy1-O5 | 107.64(18) | O7-Dy1-O5 | 104.96(18) |
| O4-Dy1-O5 | 71.43(16)  | O6-Dy1-O5 | 144.57(17) |

|            |            |            |            |
|------------|------------|------------|------------|
| O3-Dy1-O3' | 67.91(16)  | O7-Dy1-O3' | 139.08(15) |
| O4-Dy1-O3' | 135.89(17) | O6-Dy1-O3' | 82.11(15)  |
| O5-Dy1-O3' | 76.95(16)  | O3-Dy1-O2  | 131.30(14) |
| O7-Dy1-O2  | 77.87(15)  | O4-Dy1-O2  | 127.80(18) |
| O6-Dy1-O2  | 133.30(15) | O4-Dy1-O2  | 80.58(14)  |
| O7-Dy1-O2  | 75.28(17)  | O5-Dy1-O2  | 69.96(17)  |
| O3'-Dy1-O2 | 64.23(14)  | O3-Dy1-O1  | 64.48(14)  |
| O7-Dy1-O1  | 78.61(15)  | O4-Dy1-O1  | 68.66(17)  |

Table S5. Selected bond lengths (Å) and Angles (°) for **3**

|            |            |            |           |
|------------|------------|------------|-----------|
| Dy1-O3     | 2.316(4)   | Dy1-O7     | 2.295(5)  |
| Dy1-O4     | 2.317(4)   | Dy1-O6     | 2.322(4)  |
| Dy1-O5     | 2.330(4)   | Dy1-O3'    | 2.261(4)  |
| Dy1-O2     | 2.583(5)   | Dy1-O1     | 2.594(4)  |
| O3'-Dy1-O7 | 142.22(18) | O3'-Dy1-O3 | 67.27(15) |
| O7-Dy1-O3  | 137.01(17) | O3'-Dy1-O4 | 95.88(16) |



|            |            |            |            |
|------------|------------|------------|------------|
| O7-Dy1-O4  | 80.33(18)  | O3-Dy1-O4  | 137.28(16) |
| O3'-Dy1-O6 | 87.95(15)  | O7-Dy1-O6  | 73.24(17)  |
| O3-Dy1-O6  | 80.09(14)  | O4-Dy1-O6  | 140.56(16) |
| O3'-Dy1-O5 | 106.71(17) | O7-Dy1-O5  | 107.3(2)   |
| O3-Dy1-O5  | 76.87(16)  | O4-Dy1-O5  | 70.88(16)  |
| O6-Dy1-O5  | 144.93(16) | O3'-Dy1-O2 | 132.31(15) |
| O7-Dy1-O2  | 76.48(19)  | O3-Dy1-O2  | 65.43(16)  |
| O6-Dy1-O2  | 78.45(18)  | O5-Dy1-O2  | 68.06(18)  |
| O7-Dy1-O1  | 79.07(18)  | O3'-Dy1-O1 | 65.43(16)  |
| O4-Dy1-O2  | 123.25(17) | O6-Dy1-O1  | 78.45(18)  |
| O3-Dy1-O1  | 127.92(14) | O4-Dy1-O1  | 67.89(15)  |

Table S6. Continuous Shape Measures (CShMs) of the coordination geometry for Dy(III) ion in complexes **1**, **1a**, **2** and **3** ( $S$  values calculated with the Shape program). The  $S$  values indicated the proximity to the ideal polyhedron, thus,  $S = 0$  corresponds to the non-distorted polyhedron. Three closer ideal geometries to the real complex are listed and below is the symmetry and description for each polyhedron.

|         | <b>1</b> | <b>1a</b> | <b>2</b> | <b>3</b> |
|---------|----------|-----------|----------|----------|
| JBTPR-8 | 16.990   |           | 3.305    |          |
| TT-8    | 14.686   |           |          | 14.070   |
| BTPR-8  | 14.909   |           | 3.103    | 16.360   |
| JSD-8   |          |           | 4.955    |          |

|         |     |                                    |
|---------|-----|------------------------------------|
| JGBF-8  |     | 13.780                             |
| TCTPR-9 |     | 1.164                              |
| CSAPR-9 |     | 1.300                              |
| MFF-9   |     | 1.704                              |
| JBTPR-8 | C2v | Biaugmented trigonal prism J50     |
| TT-8    | D2d | Triangular dodecahedron            |
| BTPR-8  | C2v | Biaugmented trigonal prism         |
| JSD-8   | D2d | Snub diphenoid J84                 |
| JGBF-8  | D2d | Johnson gyrobifastigium J26        |
| TCTPR-9 | D3h | Spherical tricapped trigonal prism |
| CSAPR-9 | C4v | Spherical capped square antiprism  |
| MFF-9   | Cs  | Muffin                             |

Table S7. Parameters used to fit the Arrhenius plots from Fig. 4 using approximations  $1/\tau = 1/\tau_{\text{QTM}} + CT^n + \tau_0^{-1}\exp(-U_{\text{eff}}/\kappa T)$  (1):

| Zero dc field                                                    | <b>1</b>             | <b>1a</b>             | <b>2</b>               | <b>3</b>             |
|------------------------------------------------------------------|----------------------|-----------------------|------------------------|----------------------|
| $\tau_{\text{QTM}}^{-1}/\text{s}^{-1}$                           | 0.0065               | 0.19                  | 0.13                   | 0.031                |
| $C/\text{s}^{-1}\text{k}^{-n}$                                   | 3.59                 | 0.037                 | 0.0076                 | 0.16                 |
| n                                                                | 3.54                 | 4.58                  | 5.59                   | 3.75                 |
| $\tau_0/\text{s}$                                                | $6.7 \times 10^{-7}$ | $5.02 \times 10^{-7}$ | $2.75 \times 10^{-10}$ | $1.9 \times 10^{-8}$ |
| $U/k$                                                            | 18.1                 | 70.3                  | 126.3                  | 109.5                |
| $1/\tau = CT^n + \tau_0^{-1}\exp(-U_{\text{eff}}/k_{\text{B}}T)$ |                      |                       |                        | (2):                 |
| Optimum field                                                    | <b>1</b>             | <b>1a</b>             | <b>2</b>               | <b>3</b>             |
| $C/\text{s}^{-1}\text{k}^{-n}$                                   | 5.70                 | 0.025                 | 0.0077                 | 0.034                |
| n                                                                | 3.04                 | 4.92                  | 5.63                   | 4.54                 |

|            |                       |                       |                        |                      |
|------------|-----------------------|-----------------------|------------------------|----------------------|
| $\tau_0/s$ | $6.97 \times 10^{-6}$ | $1.16 \times 10^{-7}$ | $1.55 \times 10^{-10}$ | $4.6 \times 10^{-9}$ |
| $U/k$      | 26.9                  | 88.1                  | 131.7                  | 125.7                |

Table S8. Best fitted parameters ( $\chi_T$ ,  $\chi_S$ ,  $\tau$  and  $\alpha$ ) with the extended Debye model for complex **3** under 0 Oe dc field in the temperature range 2-11 K.

| T/ K | $\chi_S / \text{cm}^3 \text{mol}^{-1}$ | $\chi_T / \text{cm}^3 \text{mol}^{-1}$ | $\tau/s$ | $\alpha$ | R          |
|------|----------------------------------------|----------------------------------------|----------|----------|------------|
| 2    | -0.03312                               | 5.05899                                | 0.03097  | 0.30000  | 4.9E-004   |
| 2.5  | -0.03485                               | 4.94485                                | 0.02779  | 0.30000  | 4.7E-004   |
| 3    | -0.01981                               | 4.71217                                | 0.02499  | 0.29993  | 4.5E-004   |
| 3.5  | -0.04103                               | 4.44415                                | 0.02142  | 0.30000  | 3.5E-004   |
| 4    | -0.05068                               | 4.20219                                | 0.01823  | 0.29993  | 2.9E-004   |
| 4.5  | -0.05454                               | 3.95570                                | 0.01474  | 0.29365  | 2.8E-004   |
| 5    | 0.06124                                | 3.72771                                | 0.01166  | 0.28634  | 3.0E-004   |
| 5.5  | -0.07120                               | 3.55050                                | 0.00928  | 0.28478  | 3.3E-004   |
| 6    | -0.05677                               | 3.31692                                | 0.00700  | 0.26282  | 3.3E-004   |
| 6.5  | -0.06532                               | 3.16076                                | 0.00550  | 0.26218  | 3.0E-004   |
| 7    | -0.06745                               | 2.98682                                | 0.00419  | 0.25571  | 2.8E-004   |
| 7.5  | -0.06306                               | 2.84395                                | 0.00321  | 0.25547  | 2.5E-004   |
| 8    | -0.07713                               | 2.70754                                | 0.00241  | 0.26301  | 2.1E-004   |
| 8.5  | -0.07558                               | 2.58002                                | 0.00177  | 0.27579  | 1.7E-004   |
| 9    | -0.08103                               | 2.47702                                | 0.00128  | 0.29725  | 1.7E-004   |
| 9.5  | -0.01583                               | 2.35995                                | 0.00091  | 0.30000  | 1.8E-004   |
| 10   | 0.05256                                | 2.25143                                | 0.00065  | 0.29984  | 2.1E-004   |
| 10.5 | 0.10776                                | 2.15004                                | 0.00044  | 0.29875  | 2.6E-004   |
| 11   | 0.24814                                | 2.06991                                | 0.00033  | 0.30000  | 2.4E-004   |
| 11.5 | 0.39647                                | 1.99332                                | 0.00026  | 0.29931  | 1.9E-0.004 |

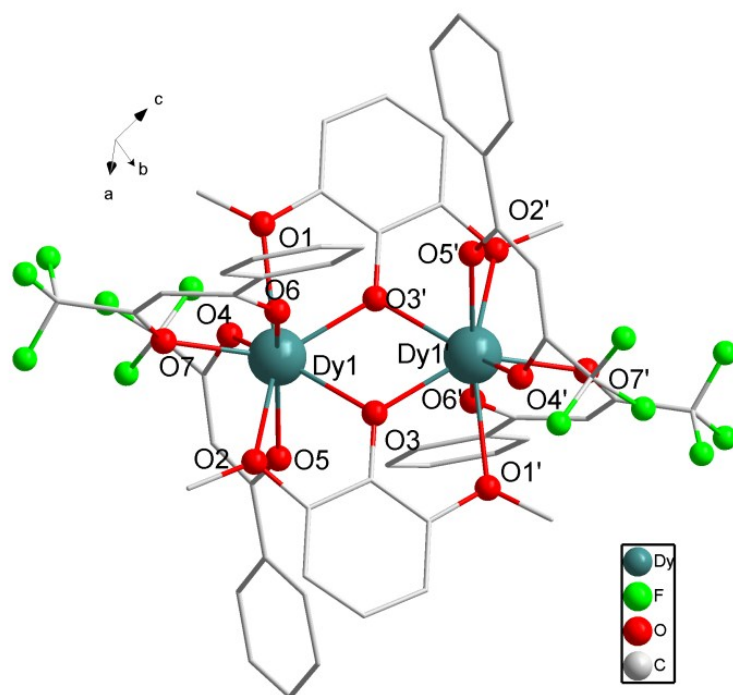

Fig. S1. Molecular structure of complex **2** Colour code: Dy (teal), O (red), F (green), C (grey). H atoms and disorder atoms were omitted for clarity.

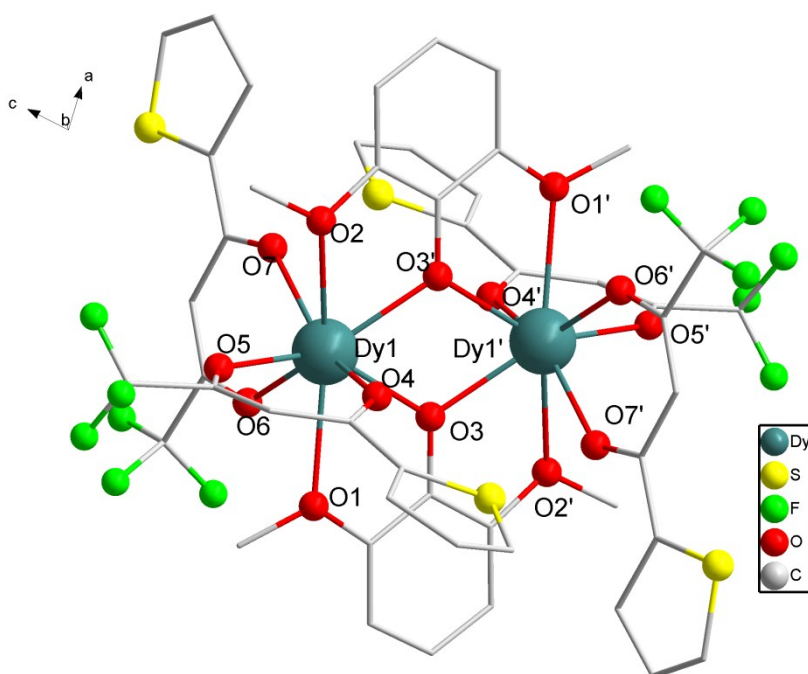

Fig. S2. Molecular structure of complex **3**. Colour code: Dy (teal), O (red), F (green), C (grey), S (yellow). H atoms and disorder atoms were omitted for clarity.

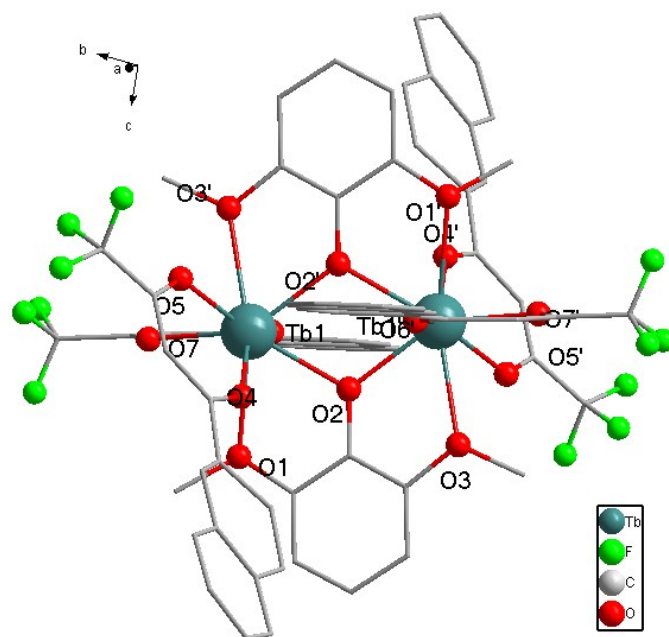

Fig. S3. Molecular structure of complex **4**. Colour code: Tb (teal), O (red), F (green), C (grey). H atoms and disorder atoms were omitted for clarity.

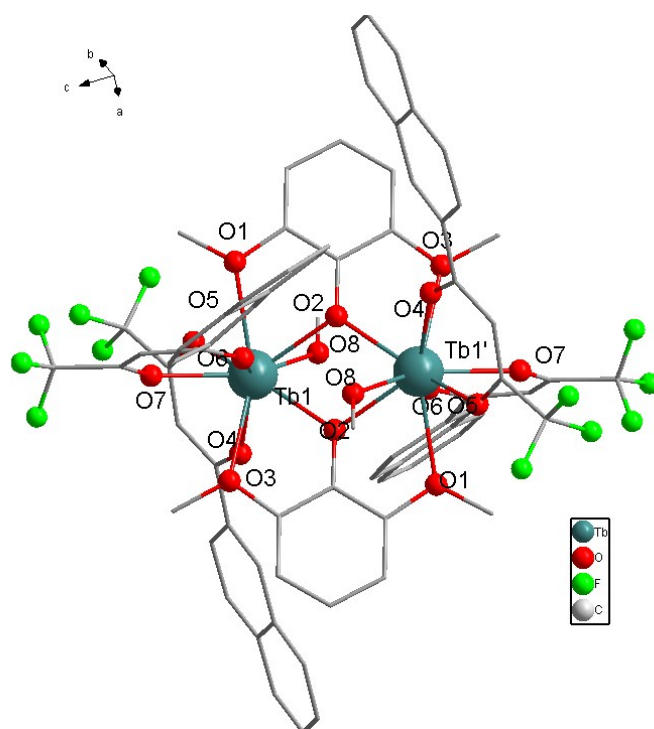

Fig. S4. Molecular structure of complex **4a**. Colour code: Tb (teal), O (red), F (green), C (grey). H atoms and disorder atoms were omitted for clarity.

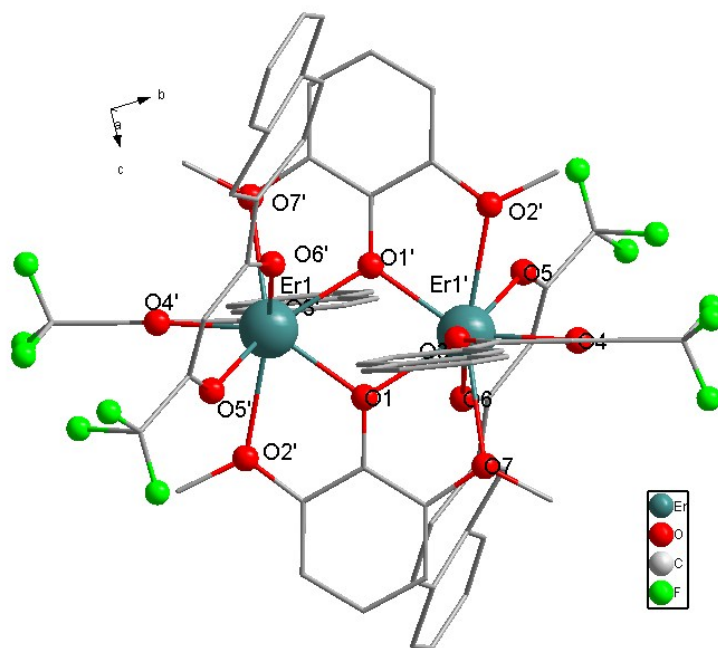

Fig. S5. Molecular structure of complex 5. Colour code: Er (teal), O (red), F (green), C (grey). H atoms and disorder atoms were omitted for clarity.

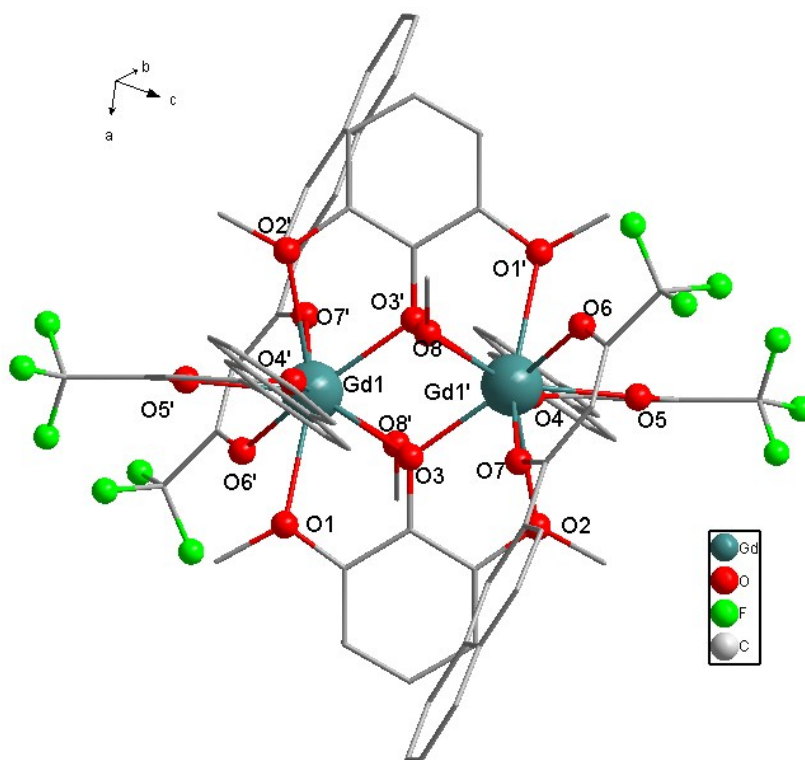

Fig. S6. Molecular structure of complex 6. Colour code: Gd (teal), O (red), F (green), C (grey). H atoms and disorder atoms were omitted for clarity.

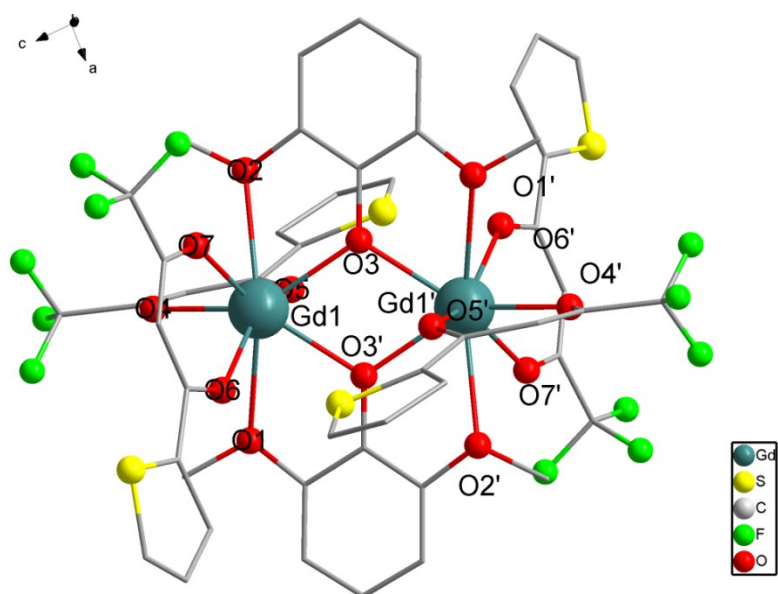

Fig. S7. Molecular structure of **7**. Colour code: Gd (teal), O (red), F (green), S (yellow), C (grey). H atoms and disorder atoms were omitted for clarity.

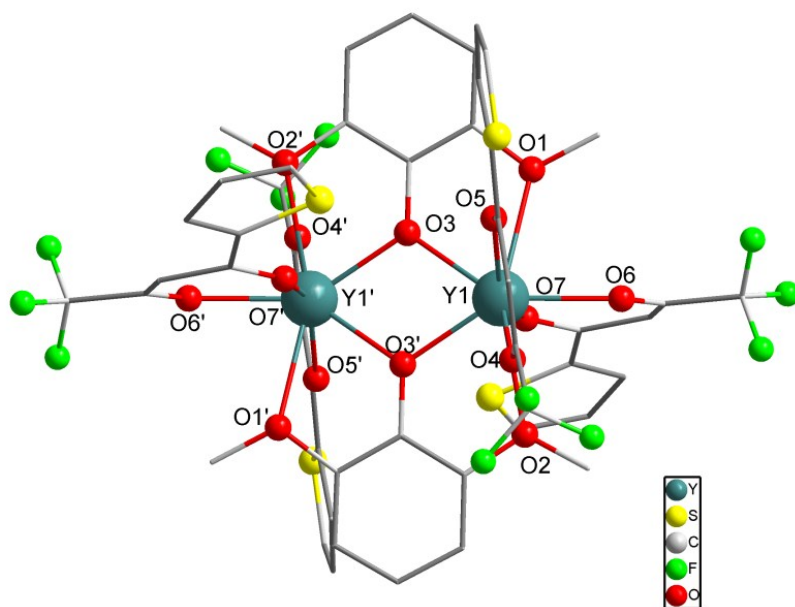

Fig. S8. Molecular structure of **3Y**. Colour code: Dy (teal), O (red), F (green), S (yellow), C (grey). H atoms and disorder atoms were omitted for clarity.

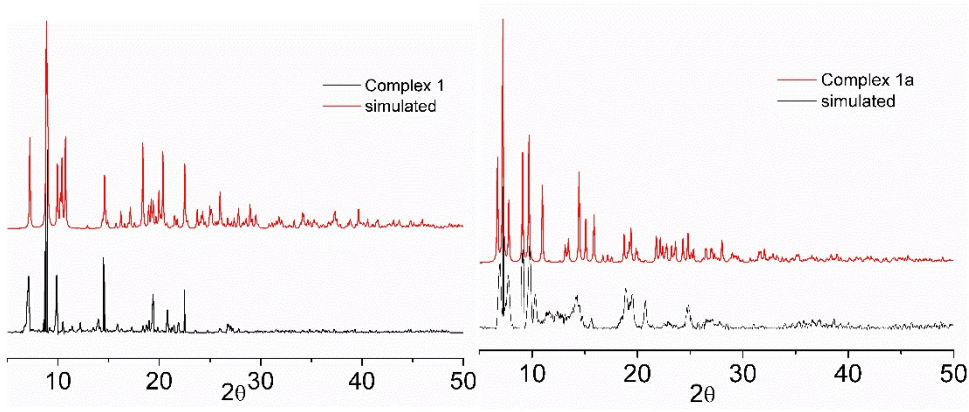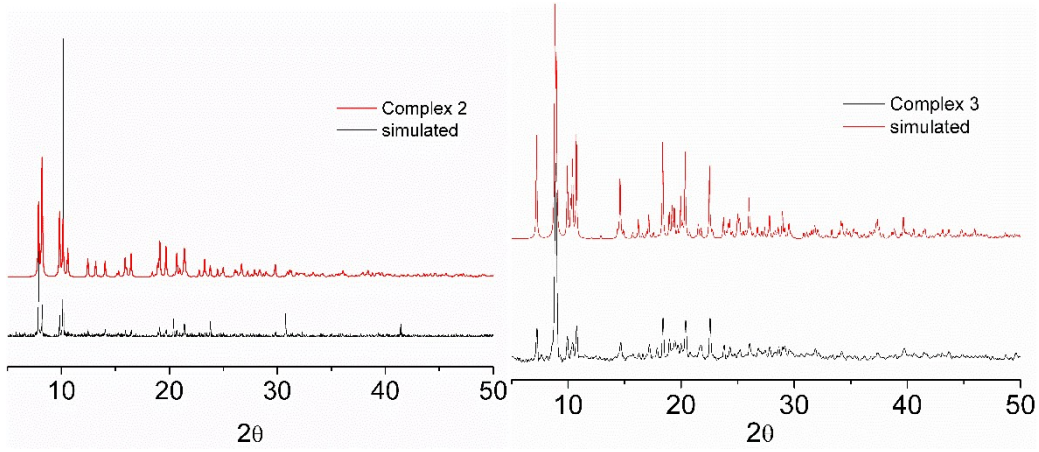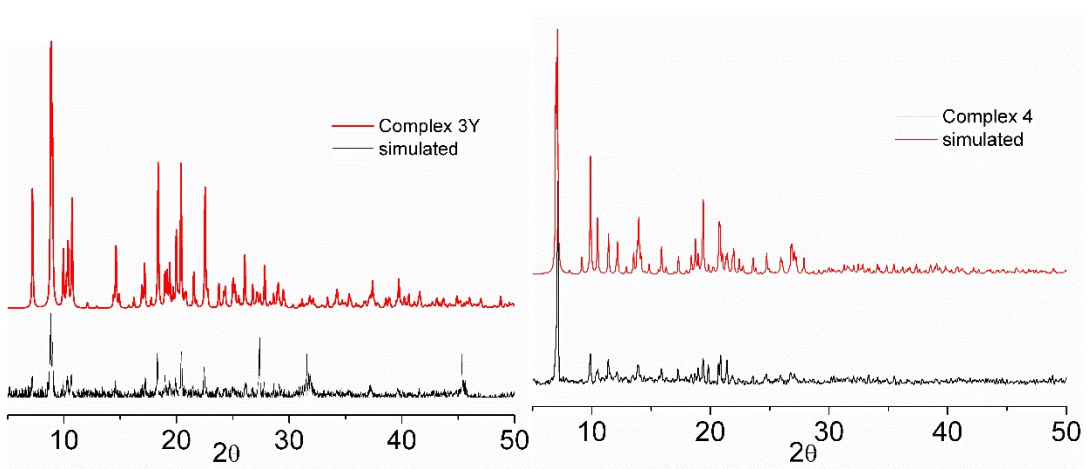



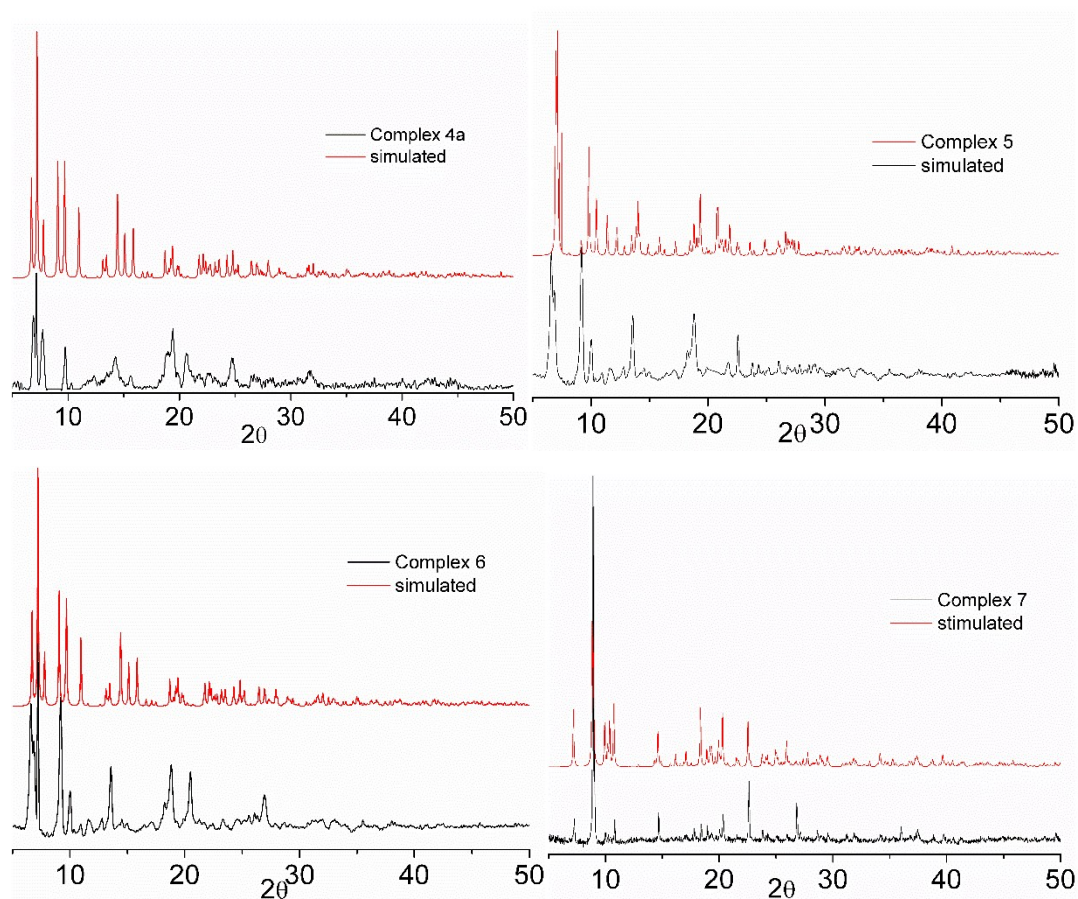

Fig. S9. PXRD analysis of complex 1-7. The red line is simulated data from single crystal data.

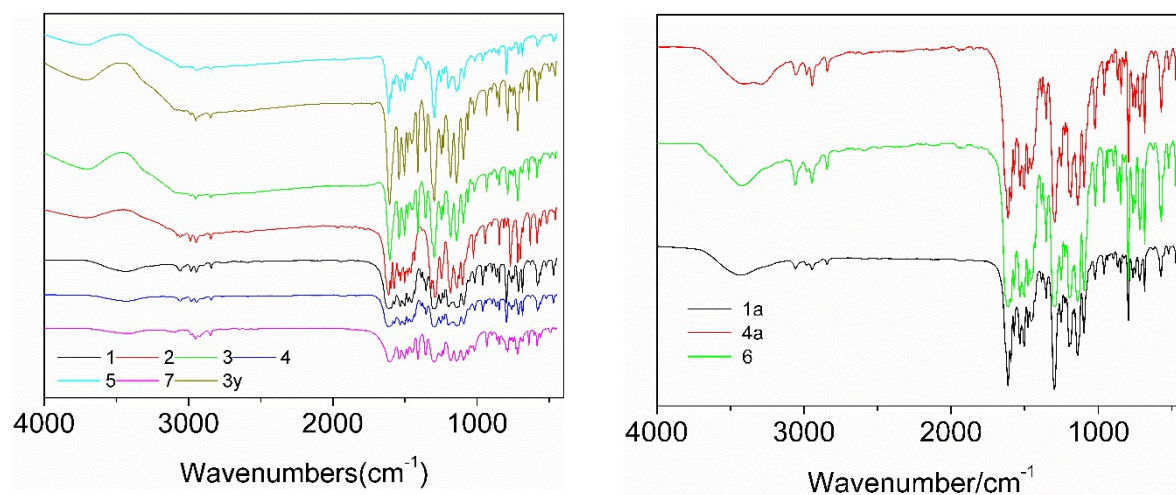

Fig. S10. FT-IR spectra of all the complexes.

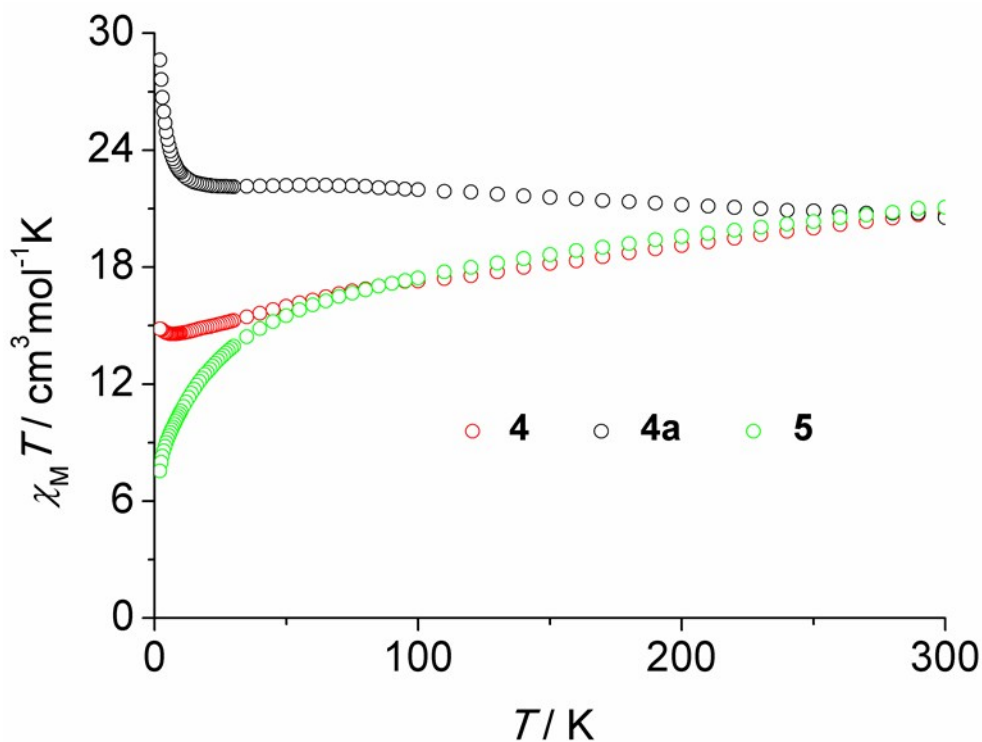

Fig. S11. Temperature dependence of the  $\chi_M T$  values  $T$  measured for **4**, **4a**, **5** complexes under 1000 Oe dc field.

With the known isotropic interaction, the Hamiltonian  $H = -JS_{\text{Gd1}} \cdot S_{\text{Gd2}}$  results in the formula for the temperature dependence of the molar magnetic susceptibility in eqn (S1), where  $g$  is the Landé factor,  $\beta$  is the Bohr magneton,  $N$  is the Avogadro number, and  $k$  is the Boltzmann constant and  $x = -J/kT$ .

$$\begin{aligned}
 \chi_m T &= \frac{2Ng^2\mu_B^2}{k} \frac{e^x + 5e^{3x} + 14e^{6x} + 30e^{10x} + 55e^{15x} + 91e^{21x}}{1 + 3e^x + 5e^{3x} + 7e^{6x} + 9e^{10x} + 11e^{15x} + 13e^{21x}} \\
 \text{(S1)}
 \end{aligned}$$

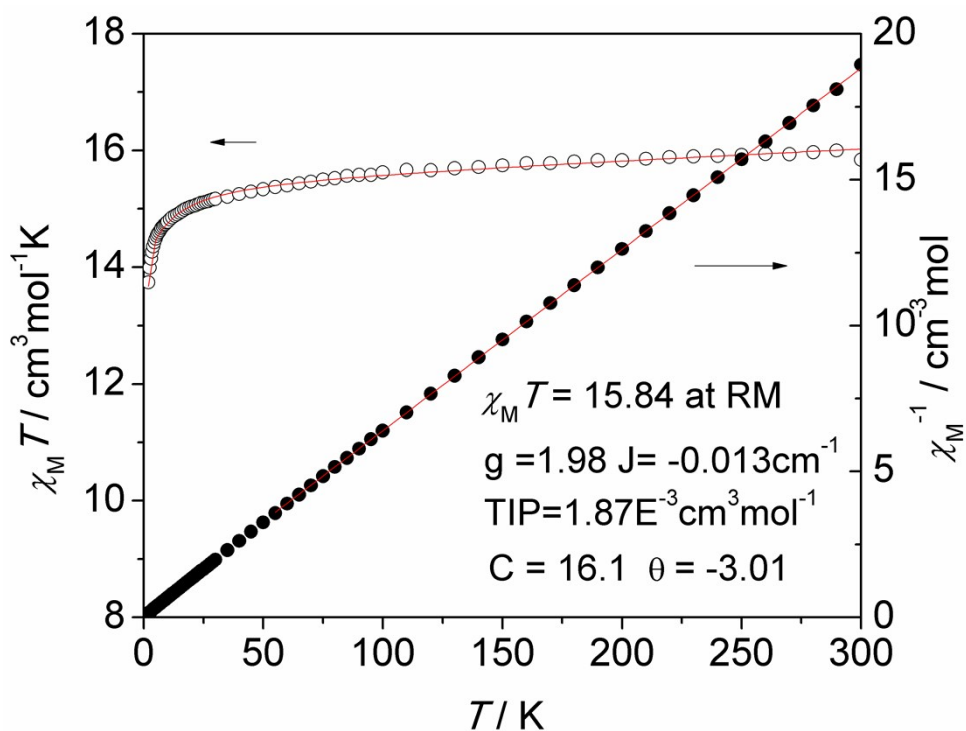

Fig. S12. Temperature dependence of the  $\chi_M T$  versus  $T$  measured under 1000 Oe dc field for **6**. The solid line corresponds to the best fit for **6**.

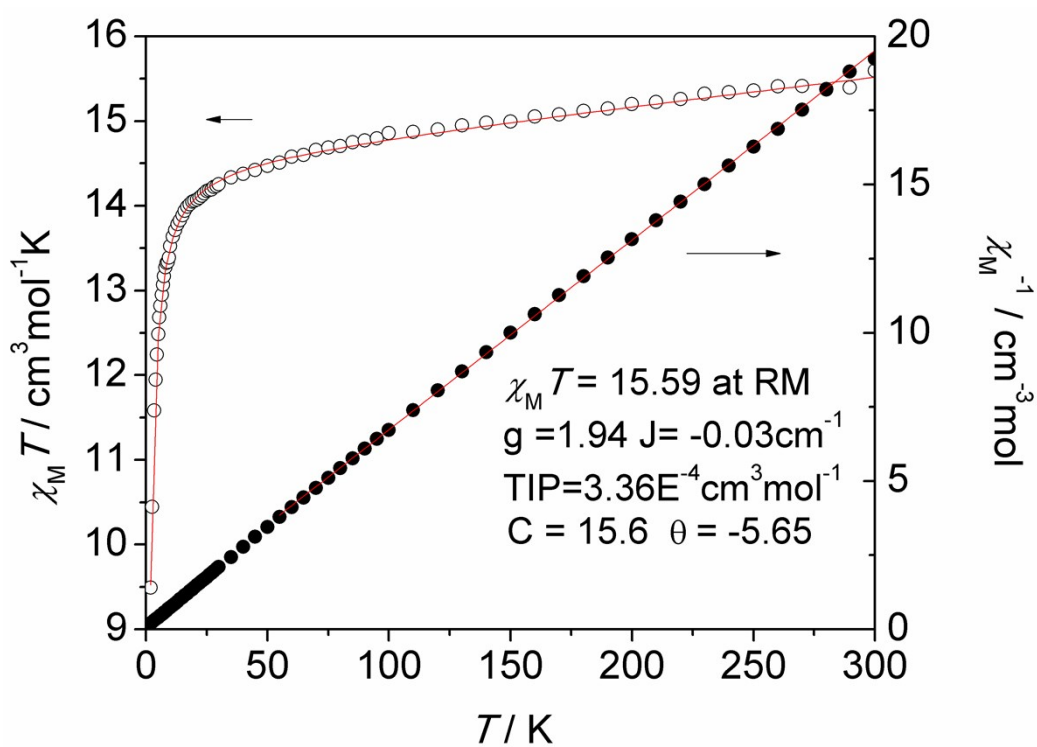

Fig. S13. Temperature dependence of the  $\chi_M T$  versus  $T$  measured under 1000 Oe dc field for **7**. The solid line corresponds to the best fit for **7**.

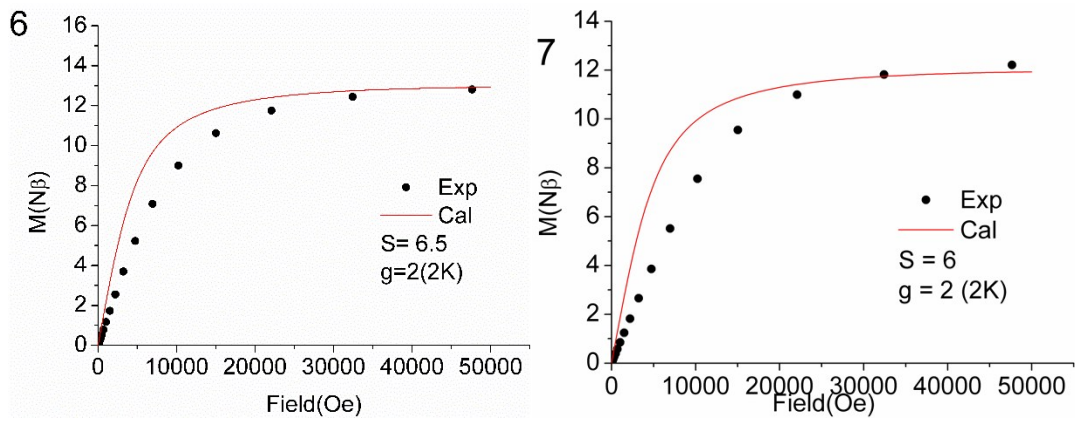

Fig. S14. Magnetization versus field data for **6** and **7** under 2K. [The red solid line is the Brillouin function for two magnetically isolated Gd(III) ions with  $g = 2.0$ ]

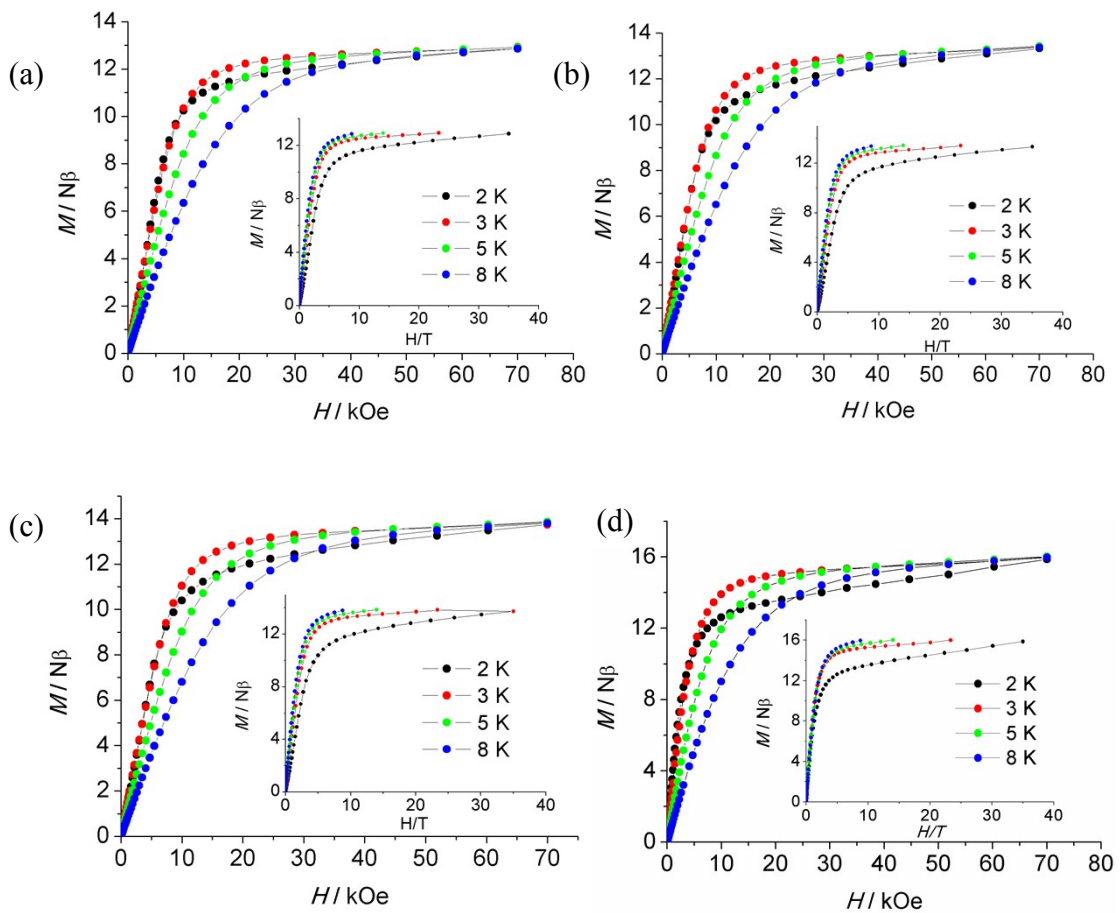

Fig. S15. Field dependences of magnetization in the field range 0-70 kOe and temperature range 2.0-8.0 K for **1(a)**, **2(b)**, **3(c)** and **1a(d)**. Inset: Plots of the reduced magnetization  $M$  versus  $H/T$ .

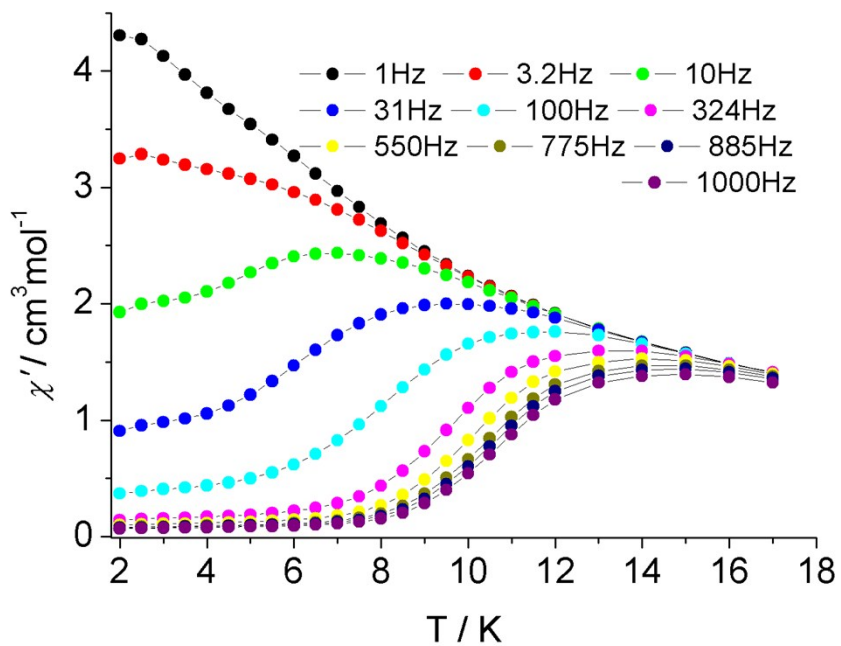

Fig. S16. Temperature dependence of the in-phase ( $\chi'$ ) for complex **3** under zero dc field.

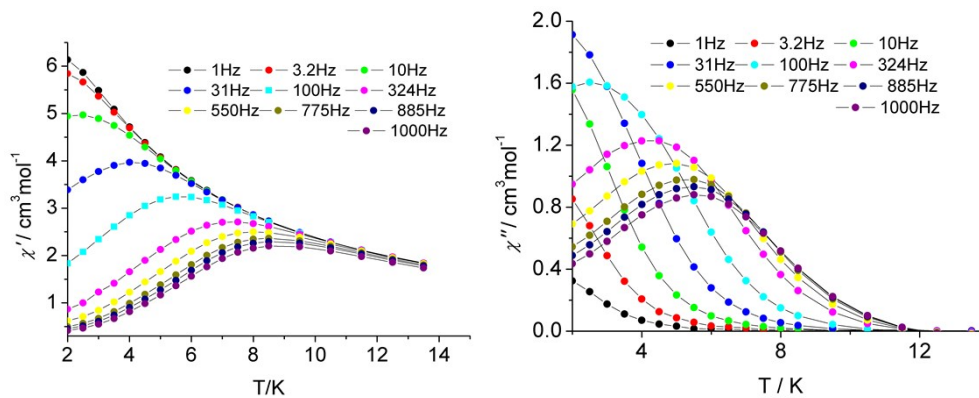

Fig. S17. Temperature dependence of the in-phase ( $\chi'$ ) and out-of-phase ( $\chi''$ ) for complex **1** under zero dc field.

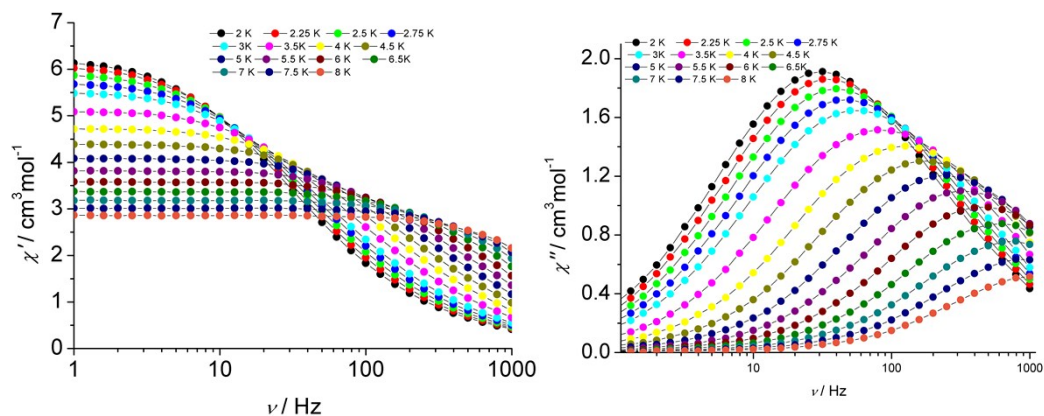

Fig. S18. Frequency dependence of the in-phase ( $\chi'$ ) and out-of-phase ( $\chi''$ ) for complex **1** under zero dc field.

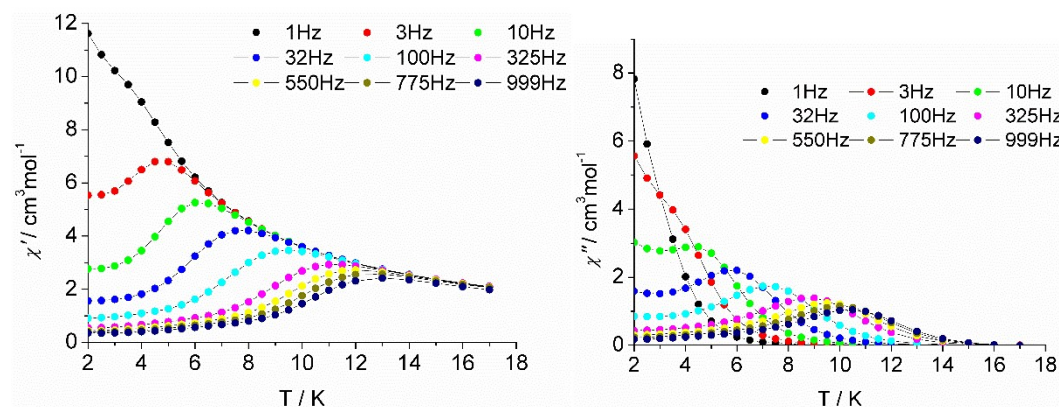

Fig. S19. Temperature dependence of the in-phase ( $\chi'$ ) and out-of-phase ( $\chi''$ ) for complex **1a** under zero dc field.

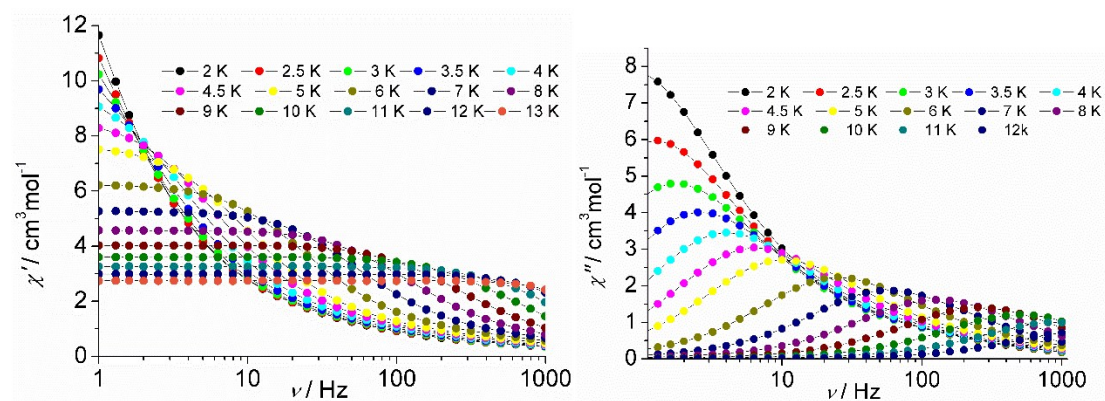

Fig. S20. Frequency dependence of the in-phase ( $\chi'$ ) and out-of-phase ( $\chi''$ ) for complex **1a** under zero dc field.

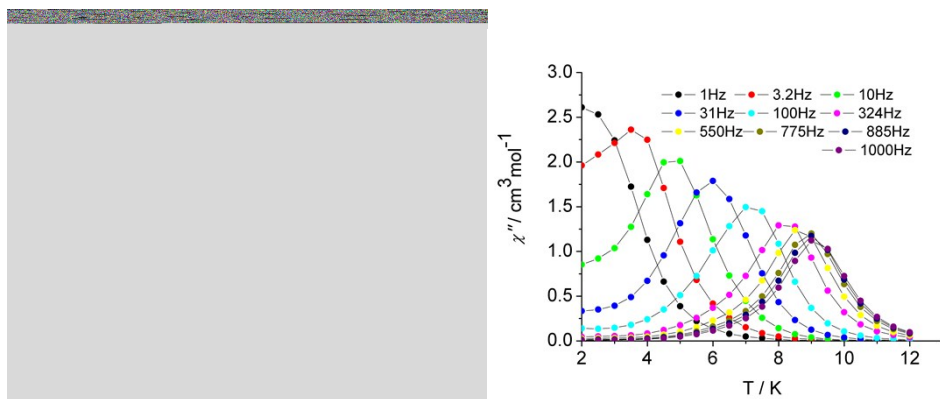

Fig. S21. Temperature dependence of the in-phase ( $\chi'$ ) and out-of-phase ( $\chi''$ ) for complex **2** under zero dc field.

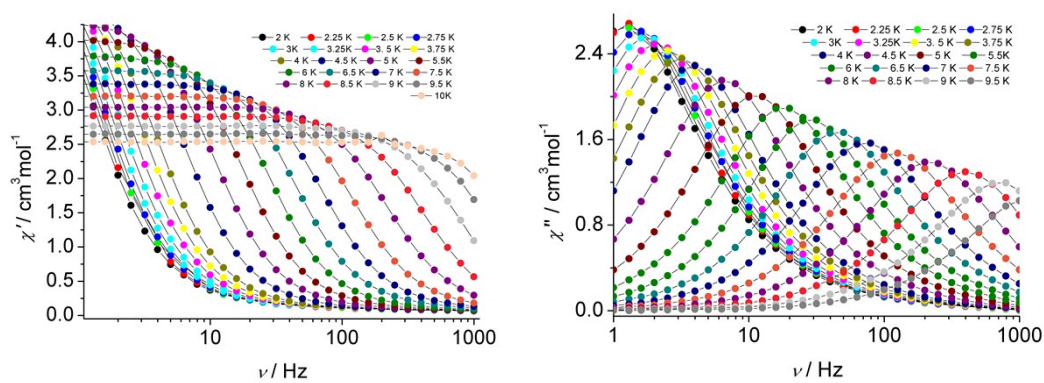

Fig. S22. Frequency dependence of the in-phase ( $\chi'$ ) and out-of-phase ( $\chi''$ ) for complex **2** under zero dc field.

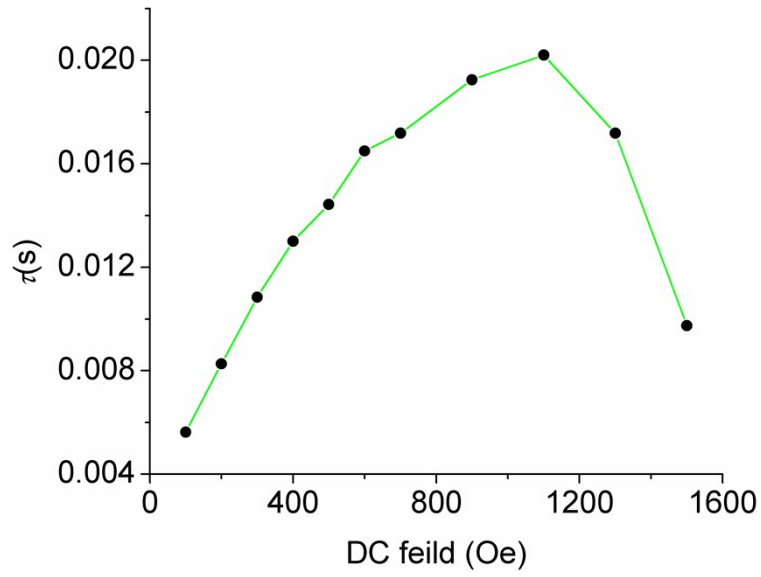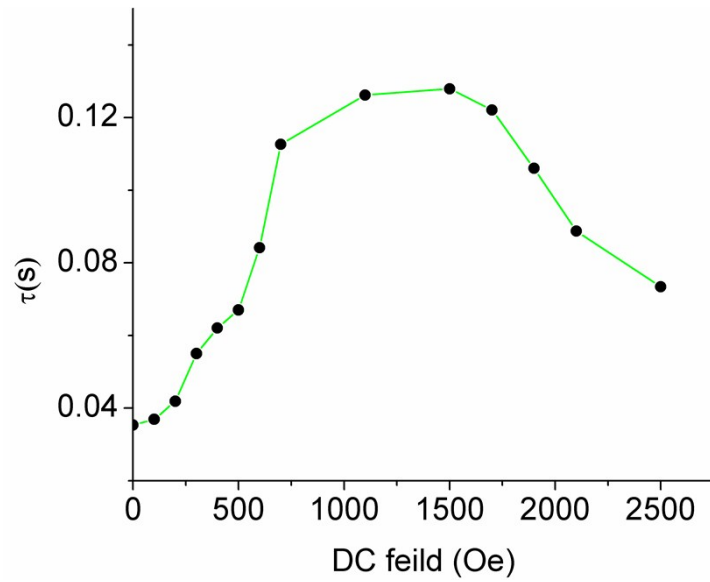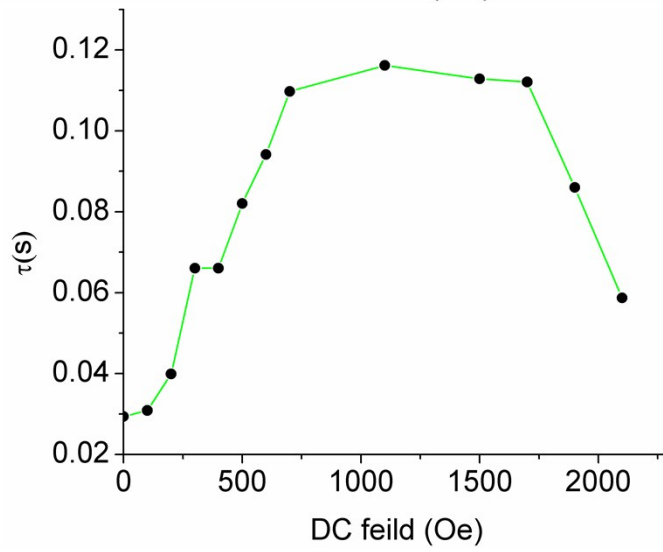

Fig. S23. Plot of  $\tau$  vs.  $H$  for **1**(up), **2**(middle), **3**(bottom) under different dc fields at 2 K. The solid line is guide for eyes.



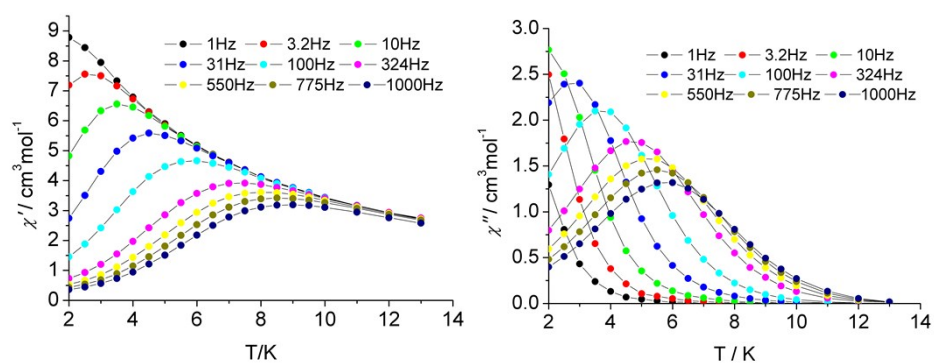

Fig. S24. Temperature dependence of the in-phase ( $\chi'$ ) and out-of-phase ( $\chi''$ ) for complex **1** under 1100 Oe dc field.

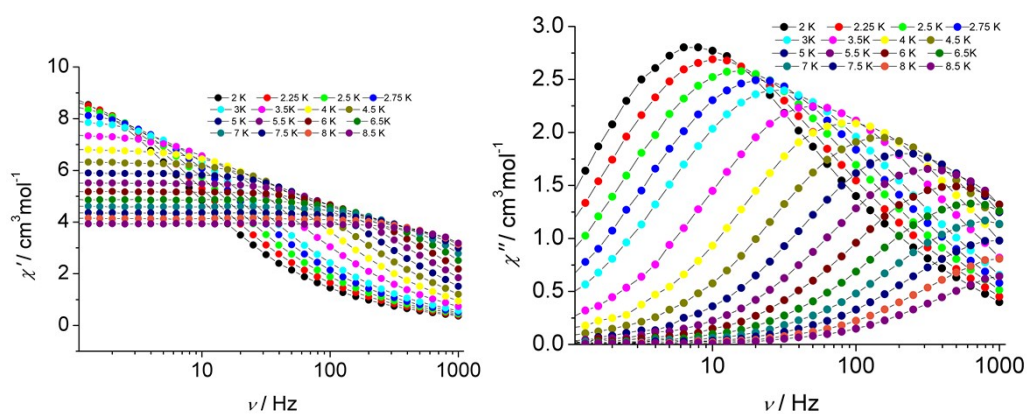

Fig. S25. Frequency dependence of the in-phase ( $\chi'$ ) and out-of-phase ( $\chi''$ ) for complex **1** under 1100 Oe dc field.

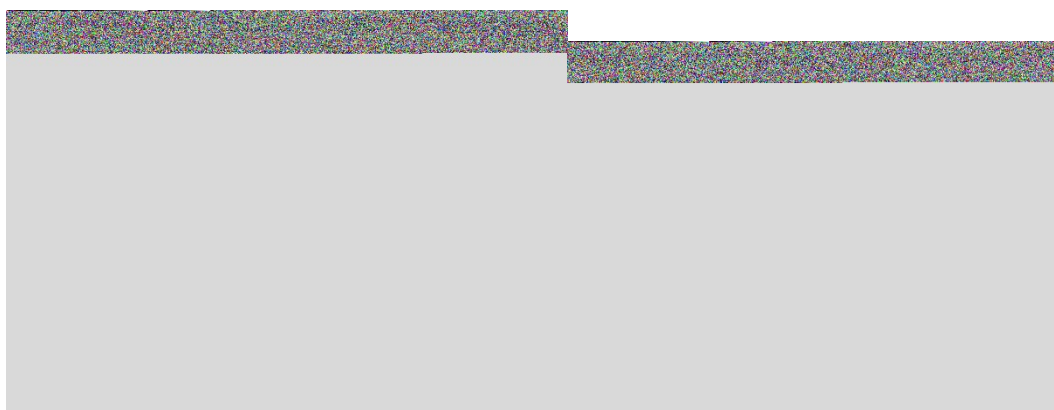

Fig. S26. Temperature dependence of the in-phase ( $\chi'$ ) and out-of-phase ( $\chi''$ ) for complex **1a** under 1500 Oe dc field.

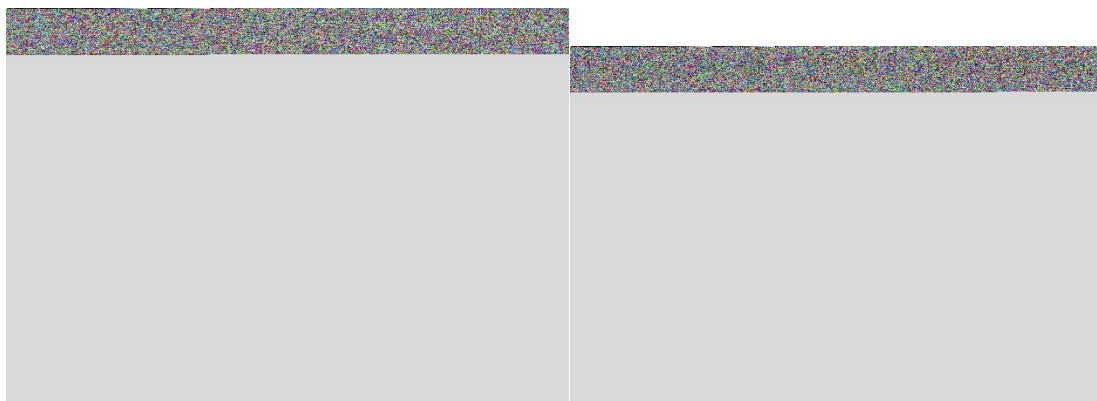

Fig. S27. Frequency dependence of the in-phase ( $\chi'$ ) and out-of-phase ( $\chi''$ ) for complex **1a** under 1500 Oe dc field.

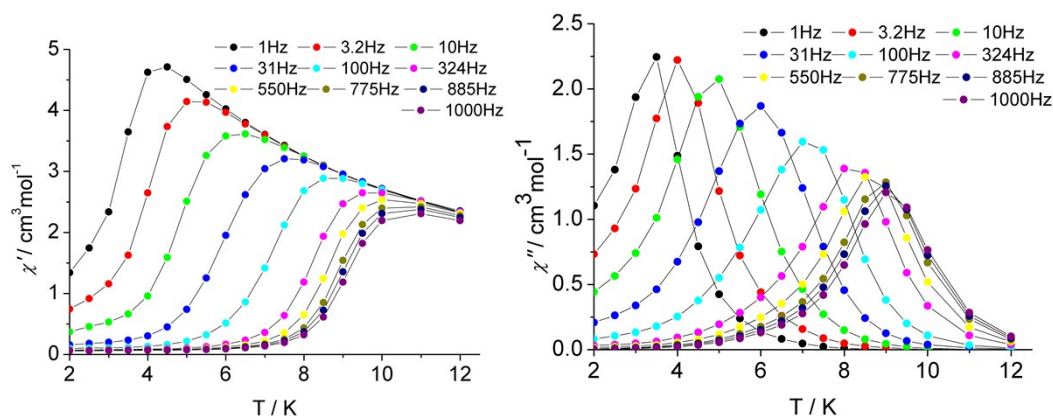

Fig. S28. Temperature dependence of the in-phase ( $\chi'$ ) and out-of-phase ( $\chi''$ ) for complex **2** under 1500 Oe dc field.

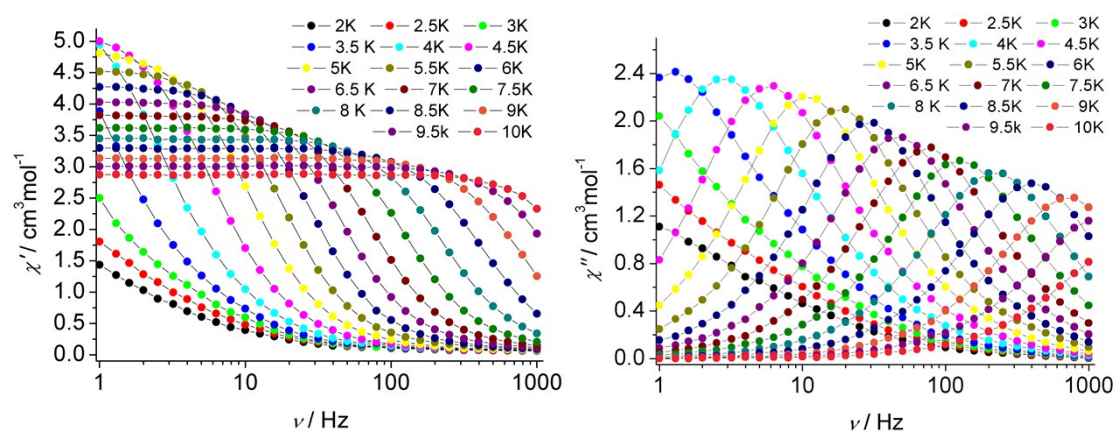

Fig. S29. Frequency dependence of the in-phase ( $\chi'$ ) and out-of-phase ( $\chi''$ ) for complex **2** under 1500 Oe dc field.

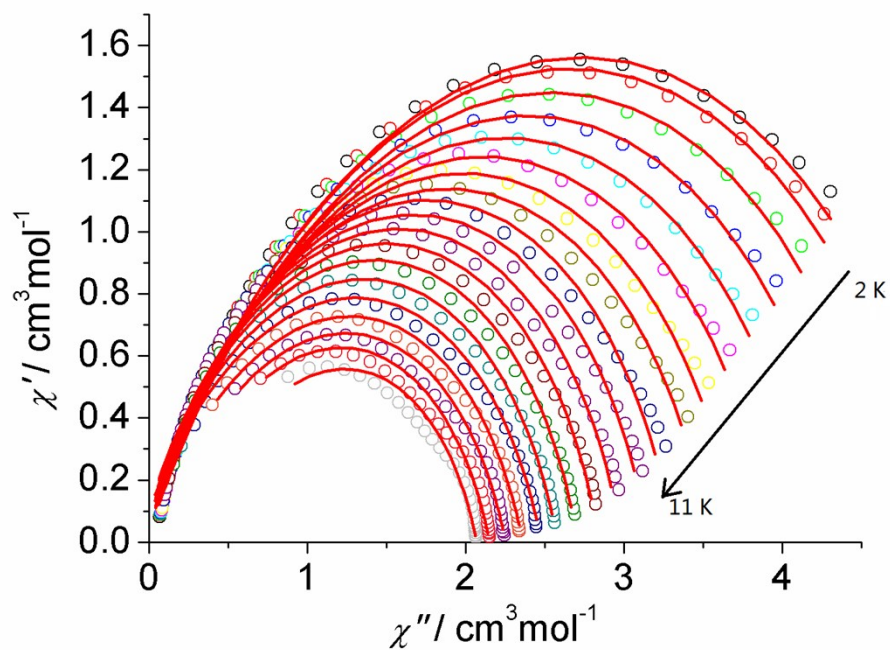

Fig. S30. The Cole-Cole plots of **3** in the temperature range of 2-11 K. The red lines are the best fits using an extended Debye model.

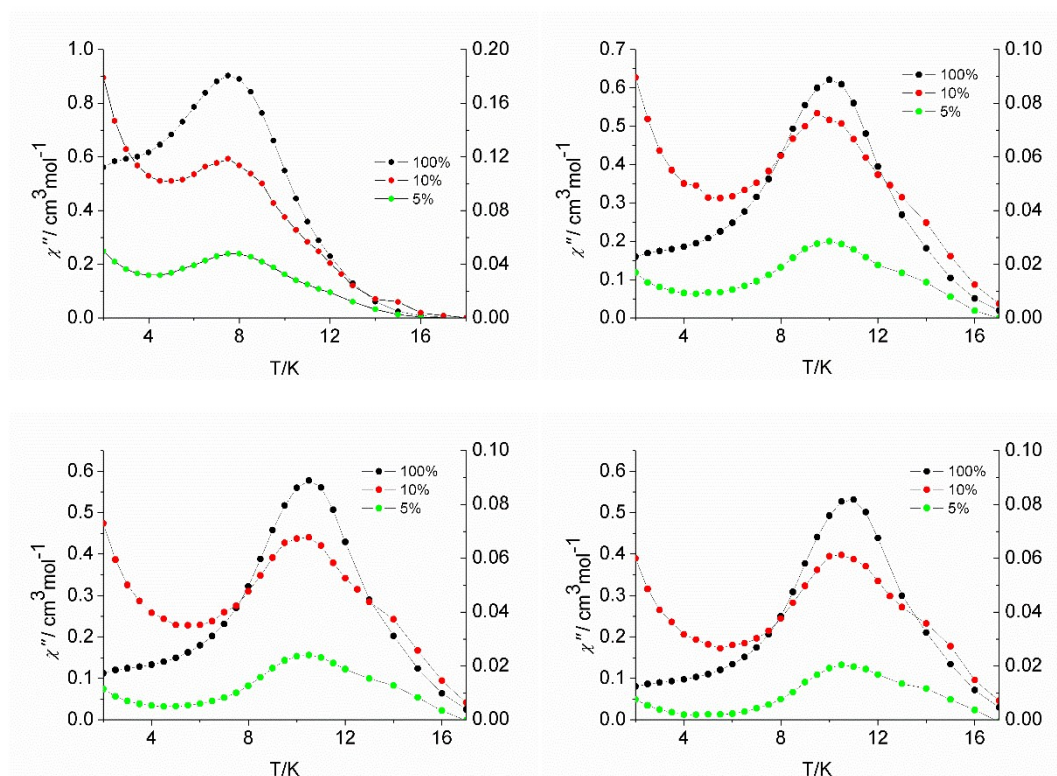

Fig. S31. Temperature dependence of the out-of-phase ( $\chi''$ ) plot at 100 Hz (top left), 550 Hz (top right), 775 Hz (bottom left), 1000 Hz (bottom right) under 0 dc field for the diluted samples.

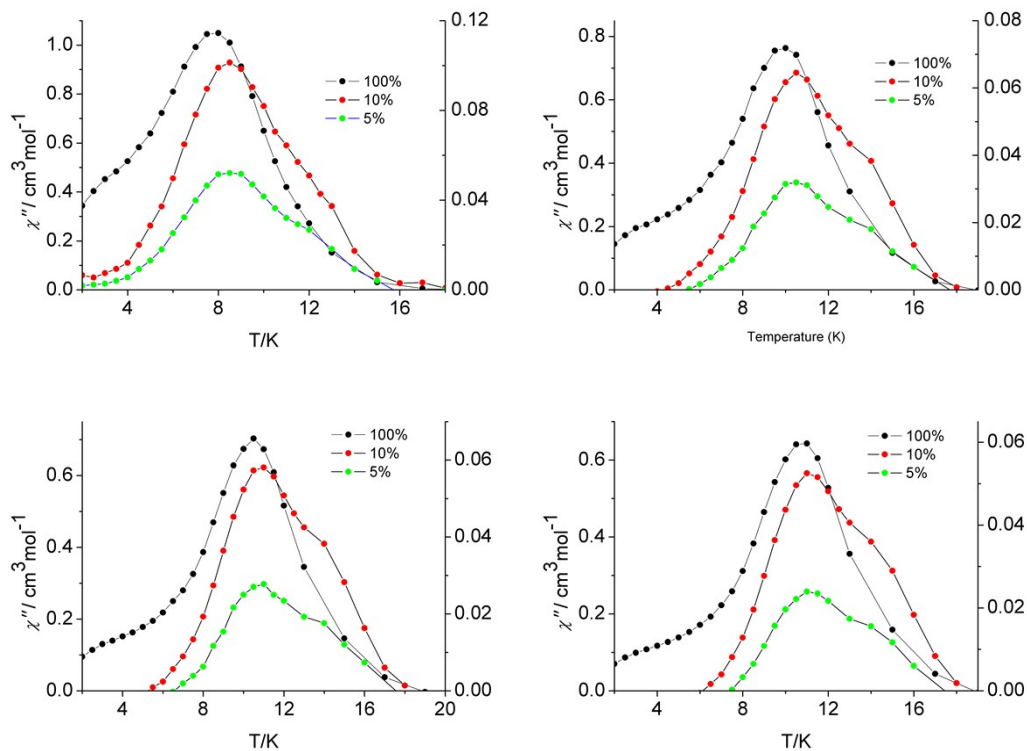

Fig. S32. Temperature dependence of the out-of-phase susceptibility ( $\chi''$ ) plot at 100 Hz (top left), 550 Hz (top right), 775 Hz (bottom left), 1000 Hz (bottom right) under 1500 Oe dc field for the diluted samples.

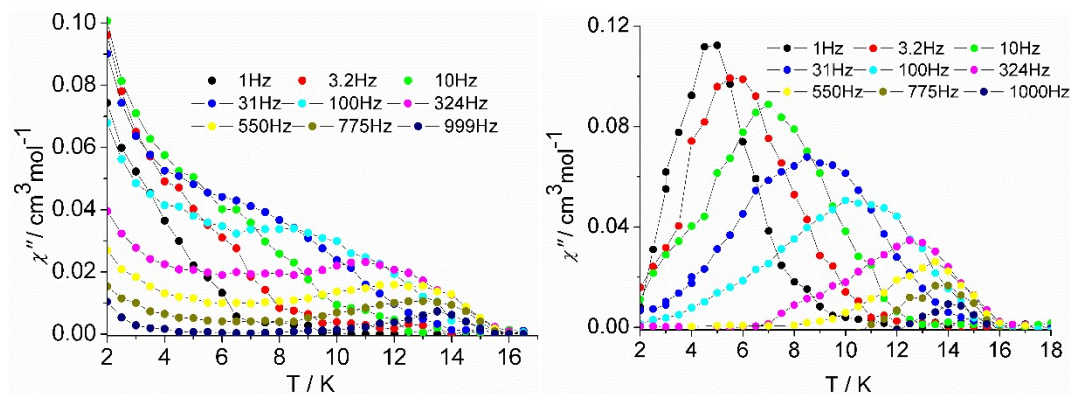

Fig. S33. Temperature dependence of out-of-phase ( $\chi''$ ) for **3M** under applied fields of 0 (left) and the 1500 Oe dc field (right).

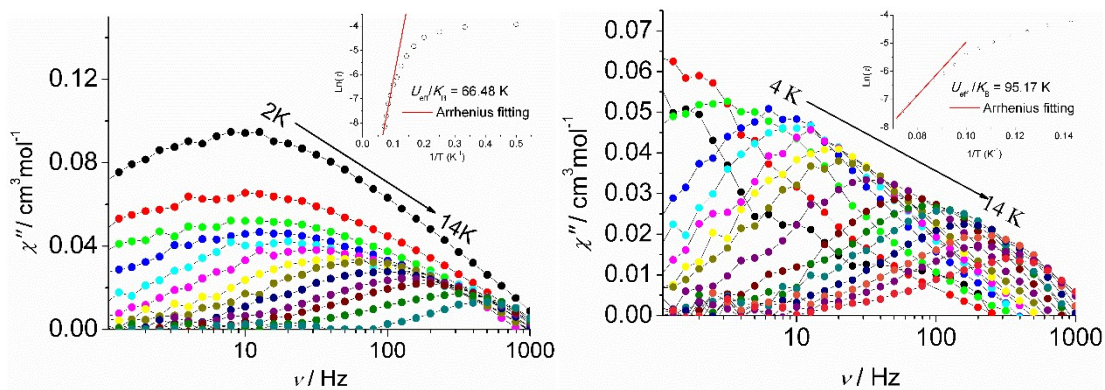

Fig. S34. Frequency dependence of out-of-phase ( $\chi''$ ) for **3M** under applied fields of zero (left) and 1500 Oe dc field (right). Inset: plot of  $\ln(\tau)$  vs.  $1/T$ .

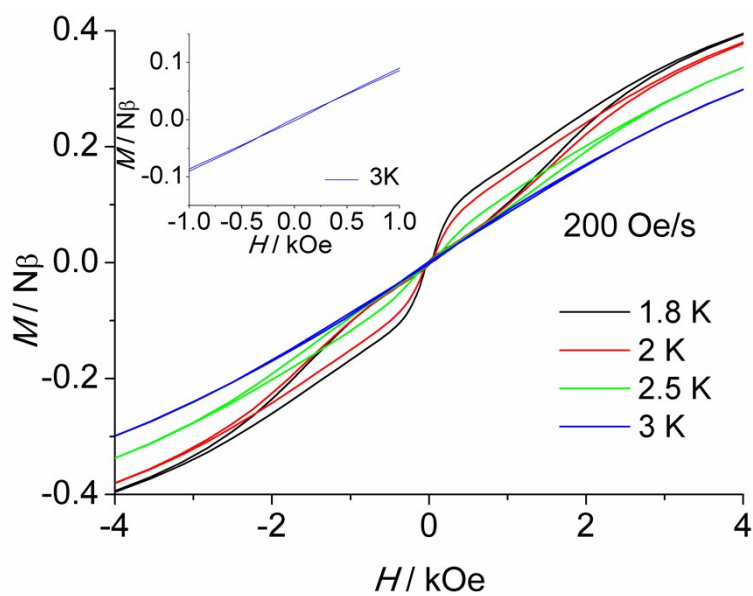

Fig. S35. Hysteresis loop for 10% Dy sample between 1.8 K and 3 K at the indicated sweep rates.

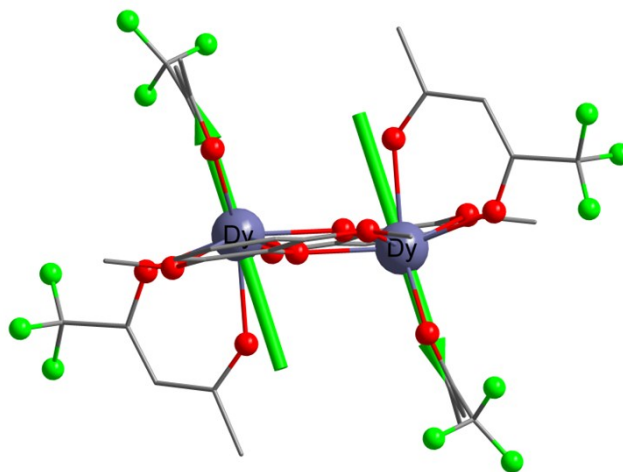

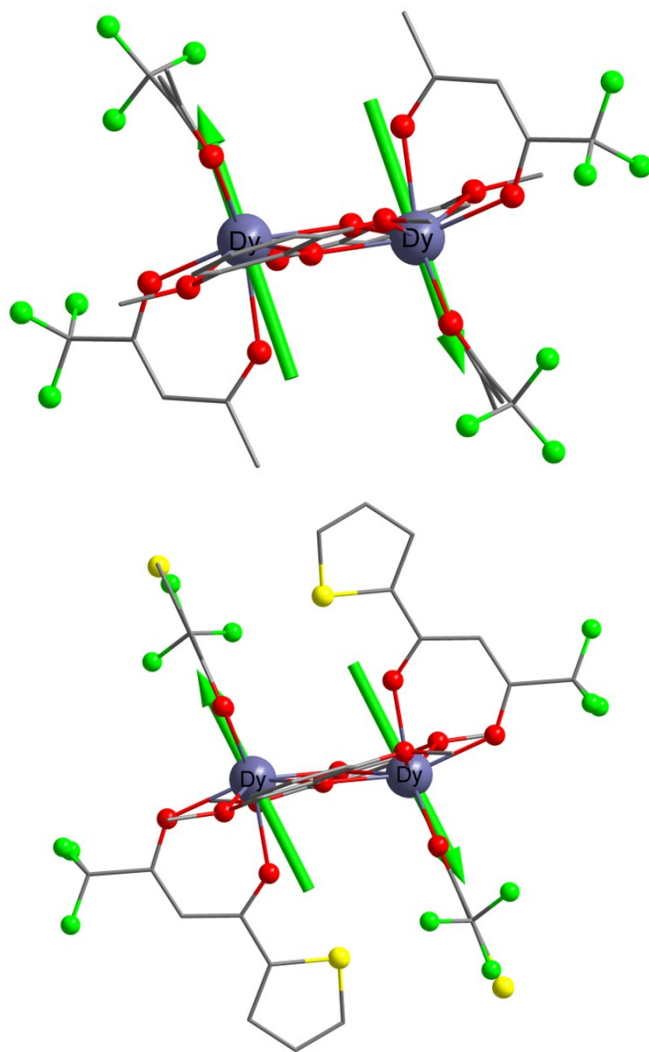

Fig. S36. Orientations of the local main magnetic axes of the ground doublets on Dy(III) ions of **1**(up), **2**(middle) and **3**(bottom).

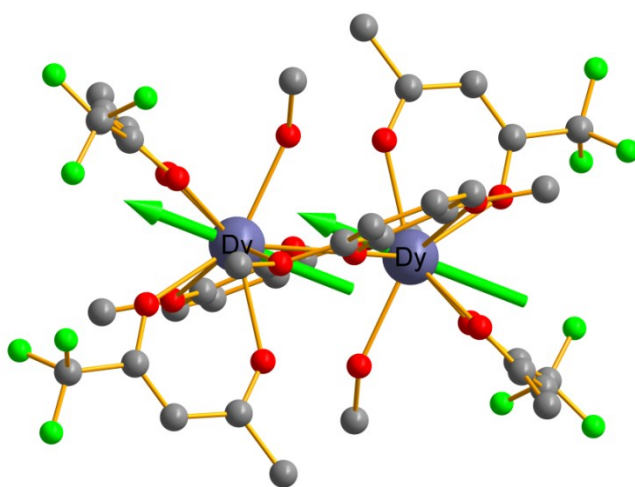

Fig. S37. Orientations of the local main magnetic axes of the ground doublets on Dy(III) ions of **1a**.

## Computational details

There is only one type of Dy<sup>3+</sup> ion for complex **1a**, and thus we need to calculate one Dy<sup>3+</sup> fragment. There are two types of Dy<sup>3+</sup> ions for each of complexes **1–3**, and thus we need to calculate two Dy<sup>3+</sup> fragments for each of them. Complete-active-space self-consistent field (CASSCF) calculations on individual lanthanide Dy<sup>3+</sup> fragment of the model structure extracted from each complex see Fig. S38 for the model structure) on the basis of X-ray determined geometry have been carried out with MOLCAS 7.8 program package.<sup>S1</sup>

During the calculations, the other three Dy<sup>3+</sup> ions for each complex were replaced by diamagnetic Lu<sup>3+</sup>. The basis sets for all atoms are atomic natural orbitals from the MOLCAS ANO-RCC library: ANO-RCC-VTZP for Dy<sup>3+</sup> ions; VTZ for close O and N; VDZ for distant atoms. The calculations employed the second order Douglas-Kroll-Hess Hamiltonian, where scalar relativistic contractions were taken into account in the basis set and the spin-orbit couplings were handled separately in the restricted active space state interaction (RASSI-SO) procedure. For the fragment of Dy<sup>3+</sup>, active electrons in 7 active spaces include all *f* electrons (CAS(9 in 7) in the CASSCF calculation. We have mixed the maximum number of spin-free state which was possible with our hardware (all from 21 sextets, 128 from 224 quadruplets, 130 from 490 doublets for the Dy<sup>3+</sup> fragment).

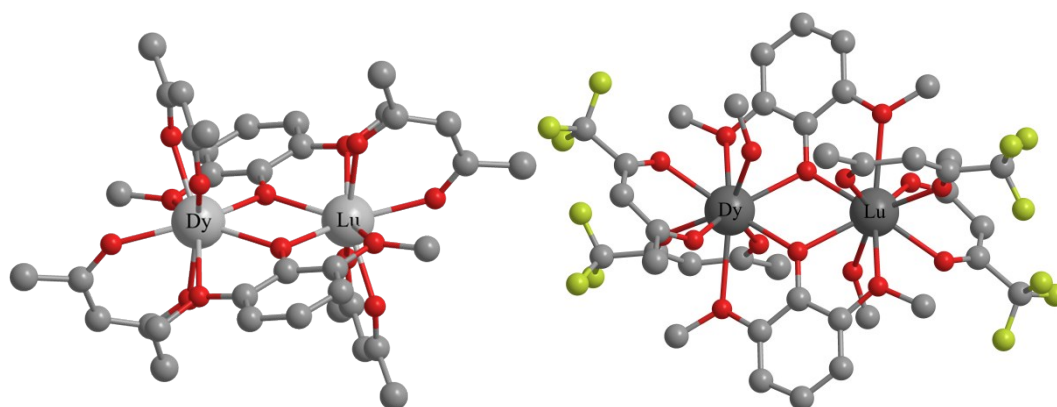

Fig. S38. Calculated model structure of complex **1** and **1a**. H atoms are omitted for clarity.

To fit the exchange interactions in four complexes, we took two steps to obtain them. Firstly, we calculated one Dy<sup>3+</sup> fragment using CASSCF to obtain the corresponding magnetic properties. And then, the exchange interaction between the magnetic centers is considered within the Lines model,<sup>S2</sup> while the account of the dipole-dipole magnetic coupling is treated exactly. The Lines model is effective and has been successfully used widely in the research field of f-element single-molecule magnets.<sup>S3</sup>

For each of complexes **1–3**, there is only one type of  $J$ .

The exchange Hamiltonian is:

$$H_{\text{exch}} = -J^{\text{total}} \hat{S}_{\text{Dy}1} \hat{S}_{\text{Dy}2}$$

The  $J^{\text{total}}$  is the parameter of the total magnetic interaction ( $J^{\text{total}} = J^{\text{dipolar}} + J^{\text{exchange}}$ ) between magnetic center ions. The  $\hat{S}_{\text{Dy}} = \pm 1/2$  are the ground pseudospin on the Dy<sup>3+</sup> sites. The dipolar magnetic coupling can be calculated exactly, while the exchange coupling constants were fitted through comparison of the computed and measured magnetic susceptibility and molar magnetization using the POLY\_ANISO program.<sup>S4</sup>

Table S9. Energies (cm<sup>-1</sup>) and  $\mathbf{g}$  ( $g_x$ ,  $g_y$ ,  $g_z$ ) tensors of the lowest spin-orbit states on one Dy<sup>3+</sup> fragment of Dy-based complexes.

| <b>1</b> |              | <b>2</b> |              | <b>3</b> |              | <b>1a</b> |              |
|----------|--------------|----------|--------------|----------|--------------|-----------|--------------|
| $E$      | $\mathbf{g}$ | $E$      | $\mathbf{g}$ | $E$      | $\mathbf{g}$ | $E$       | $\mathbf{g}$ |
| 0.0      | 0.023        | 0.0      | 0.037        | 0.0      | 0.041        | 0.0       | 0.0297       |
|          | 0.085        |          | 0.047        |          | 0.184        |           | 0.0651       |
|          | 18.851       |          | 19.556       |          | 18.867       |           | 19.0179      |
| 30.1     | 0.024        | 45.3     | 0.014        | 39.3     | 0.082        | 101.2     | 0.0858       |



|       |                          |       |                          |       |                          |       |                             |
|-------|--------------------------|-------|--------------------------|-------|--------------------------|-------|-----------------------------|
|       | 0.109<br>18.447          |       | 0.067<br>19.264          |       | 0.119<br>18.644          |       | 0.1697<br>16.5708           |
| 134.5 | 0.295<br>0.419<br>13.971 | 138.5 | 0.222<br>0.528<br>14.177 | 147.3 | 0.356<br>0.512<br>15.266 | 188.7 | 0.3476<br>0.4634<br>14.4674 |
| 172.2 | 5.238<br>5.913<br>8.048  | 193.8 | 8.284<br>6.129<br>3.782  | 197.3 | 1.527<br>2.012<br>9.274  | 229.4 | 1.6494<br>3.4311<br>13.4552 |
| 220.9 | 1.383<br>1.952<br>11.236 | 236.2 | 1.932<br>3.340<br>10.514 | 236.1 | 0.220<br>1.006<br>16.902 | 246.6 | 3.0649<br>5.0623<br>9.1534  |
| 311.5 | 0.055<br>1.036<br>13.765 | 321.5 | 0.103<br>0.761<br>13.880 | 251.7 | 4.485<br>6.266<br>9.155  | 295.9 | 1.4416<br>2.2017<br>12.0112 |
| 346.7 | 0.382<br>0.689<br>17.660 | 363.6 | 0.324<br>0.496<br>17.974 | 310.8 | 0.693<br>1.595<br>14.603 | 399.0 | 0.1553<br>0.2894<br>17.0576 |
| 474.2 | 0.033<br>0.059<br>19.229 | 487.3 | 0.032<br>0.055<br>19.299 | 443.6 | 0.033<br>0.089<br>19.051 | 591.1 | 0.0188<br>0.0270<br>19.5881 |

Table S10. Exchange energies ( $\text{cm}^{-1}$ ) and main values of the  $g_z$  for the lowest two exchange doublets.

|          | <b>1</b> |       | <b>2</b> |       | <b>3</b> |       | <b>1a</b> |        |
|----------|----------|-------|----------|-------|----------|-------|-----------|--------|
|          | $E$      | $g_z$ | $E$      | $g_z$ | $E$      | $g_z$ | $E$       | $g_z$  |
| <b>1</b> | 0.0      | 0.000 | 0.0      | 0.000 | 0.0      | 0.000 | 0.0       | 38.043 |

|   |     |        |     |        |     |        |     |       |
|---|-----|--------|-----|--------|-----|--------|-----|-------|
| 2 | 2.5 | 37.540 | 2.9 | 39.103 | 1.4 | 37.625 | 1.9 | 0.000 |
|---|-----|--------|-----|--------|-----|--------|-----|-------|

## References:

- S1 G. Karlstrom, R. Lindh, P. A. Malmqvist, B. O. Roos, U. Ryde, V. Veryazov, P. O. Widmark, M. Cossi, B. Schimmelpfennig, P. Neogrady and L. Seijo, MOLCAS: a Program Package for Computational Chemistry, *Comput. Mater. Sci.* 2003, **28**, 222.
- S2 M. E. Lines, *J. Chem. Phys.*, 1971, **55**, 2977.
- S3 (a) K. C. Mondal, A. Sundt, Y. H. Lan, G. E. Kostakis, O. Waldmann, L. Ungur, L. F. Chibotaru, C. E. Anson and A. K. Powell, *Angew. Chem. Int. Ed.* 2012, **51**, 7550. (b) S. K. Langley, D. P. Wielechowski, V. Vieru, N. F. Chilton, B. Moubaraki, B. F. Abrahams, L. F. Chibotaru and K. S. Murray, *Angew. Chem. Int. Ed.*, 2013, **52**, 12014.
- S4 (a) L. F. Chibotaru, L. Ungur and A. Soncini, *Angew. Chem. Int. Ed.*, 2008, **47**, 4126. (b) L. Ungur, W. Van den Heuvel and L. F. Chibotaru, *New J. Chem.*, 2009, **33**, 1224. (c) L. F. Chibotaru, L. Ungur, C. Aronica, H. Elmoll, G. Pilet and D. Luneau, *J. Am. Chem. Soc.*, 2008, **130**, 12445.
